# Supplementary material for: Generation of stress fibers through myosin-driven reorganization of the actin cortex
Source: eLife. 2021 Jan 28;10:e60710. doi: 10.7554/eLife.60710 (PMC7877910; doi:10.7554/eLife.60710)
Supplement: Figure 1—source data 1. [file elife-60710-fig1-data1.xlsx]

## Sheet: Sheet1
COMBINED								﻿Mann-Whitney-Wilcoxon rank-sum test
RMST(Pa)	Ventral stress fibers	Basal stress fiber				Ranks1	Ranks2		Ventral stress fibers	Basal stress fiber
	1252.4	118.6				78	12	count	41	45
	608.5	239.3				63	34	median
	861.18	283.03				70	40	Ranksum	2601	1140
	521.8	64.057				56	4	W	2601
	589.1	127.54				60	14	W'		966		W>W'
	789.65	98.931				67	8	mean	1783.5
	791.35	180.44				68	25	variance	13376.2
	1210	106.23				77	9	stddev	115.656
	603.33	119.7				62	13	p-value	1.56741e-12
	540.01	44.485				58	3
	1648.6	68.849				85	5	WTEST	1.56741e-12
	795.69	108.39				69	10
	412.22	217.65				46	29
	1074.8	108.39				74	10
	1430.9	258.5				83	37
	1006.3	363.18				72	44
	1416.7	370.2				82	45
	454.82	130.85				53	15
	441.3	144.63				49	18
	1692.6	334.04				86	43
	778.14	140.55				66	17
	238.5	483.1				33	55
	231.45	139.66				30	16
	1001.6	82.02				71	6
	1018.3	90.837				73	7
	294.19	1.63992				41	1
	1261	199.2				79	27
	525.57	696.96				57	65
	452.68	149.31				51	19
	1187.1	165.15				75	22
	419.35	252.33				47	36
	1322.5	43.092				81	2
	156.86	237.79				20	32
	1197.1	245.36				76	35
	453.03	261.1				52	39
	1613.8	313.14				84	42
	442.94	175.75				50	24
	1274.3	596.93				80	61
	459.31	166.25				54	23
	563.94	164.91				59	21
	610.29	429.37				64	48
		210.7					28
		232.56					31
		260.96					38
		184.68					26
n	41	45
