# Supplementary material for: Generation of stress fibers through myosin-driven reorganization of the actin cortex
Source: eLife. 2021 Jan 28;10:e60710. doi: 10.7554/eLife.60710 (PMC7877910; doi:10.7554/eLife.60710)
Supplement: Figure 2—figure supplement 1—source data 1. [file elife-60710-fig2-figsupp1-data1.xlsx]

## Sheet: Combined_1
Dorsal stress fiber photoactivation
Sample	Peak 0s	Peak 300s	Distance (um)	um/min
006_dorsal_1_plotprofiles	2.54	3.52	0.98	0.196
008_dorsal_1_plotprofiles	2.32	3.68	1.36	0.272
008_dorsal_2_plotprofiles	2.64	4.32	1.68	0.336
010_dorsal_1_plotprofiles	2.24	3.52	1.28	0.256
012_dorsal_1_plotprofiles	2.56	3.84	1.28	0.256
017_dorsal_1_plotprofiles	2.56	4	1.44	0.288
160920_017_dorsal_1_plotprofiles	3.28	4.4	1.12	0.224
Average				0.261143
SEM				0.0169866
STDEV				0.0449423
Cortical stress fiber photoactivation
Sample	Peak 0s	Peak 300s	Distance (um)	um/min
002_cortical_1_plotprofiles	2.4	2.32	-0.08	-0.016
002_cortical_2_plotprofiles	2.4	2.56	0.16	0.032
002_cortical_3_plotprofiles	2.48	2.08	-0.4	-0.08
002_cortical_4_plotprofiles	2.48	2.96	0.48	0.096
003_cortical_1_plotprofiles	2.48	2.56	0.08	0.016
003_cortical_2_plotprofiles	2.48	2.72	0.24	0.048
003_cortical_3_plotprofiles	2.56	2.48	-0.08	-0.016
004_cortical_1_plotprofiles	2.48	2.8	0.32	0.064
004_cortical_2_plotprofiles	2.64	3.04	0.4	0.08
004_cortical_3_plotprofiles	2.24	2.56	0.32	0.064
006_cortical_1_plotprofiles	2.4	2.32	-0.08	-0.016
006_cortical_2_plotprofiles	2.56	2.48	-0.08	-0.016
006_cortical_3_plotprofiles	2.56	2.4	-0.16	-0.032
007_cortical_1_plotprofiles	2.4	2.64	0.24	0.048
007_cortical_2_plotprofiles	2.72	2.56	-0.16	-0.032
007_cortical_3_plotprofiles	2.4	2.56	0.16	0.032
008_cortical_1_plotprofiles	2.32	2.56	0.24	0.048
008_cortical_2_plotprofiles	2.64	2.72	0.08	0.016
008_cortical_3_plotprofiles	2.72	2.88	0.16	0.032
008_cortical_4_plotprofiles	2.4	2.08	-0.32	-0.064
010_cortical_1_plotprofiles	2.48	2.64	0.16	0.032
010_cortical_2_plotprofiles	2.4	2.72	0.32	0.064
011_cortical_1_plotprofiles	2.64	2.56	-0.08	-0.016
012_cortical_1_plotprofiles	3.04	3.04	0	0
012_cortical_2_plotprofiles	2.56	2.24	-0.32	-0.064
013_cortical_1_plotprofiles	2.56	2.48	-0.08	-0.016
014_cortical_1_plotprofiles	2.16	2.24	0.08	0.016
014_cortical_2_plotprofiles	2.72	2.48	-0.24	-0.048
014_cortical_3_plotprofiles	2.56	2.4	-0.16	-0.032
014_cortical_4_plotprofiles	2.48	3.12	0.64	0.128
015_cortical_1_plotprofiles	2.64	2.72	0.08	0.016
015_cortical_2_plotprofiles	2.4	2.48	0.08	0.016
019_cortical_1_plotprofiles	3.04	3.28	0.24	0.048
Average				0.0135758
SEM				0.00838819
STDEV				0.0481865

## Sheet: Analysis
Sample_Dorsal SF	um/min		Sample_Cortical SF		F-Test Two-Sample for Variances
006_dorsal_1_plotprofiles	0.196	-0.016	002_cortical_1_plotprofiles
008_dorsal_1_plotprofiles	0.272	0.032	002_cortical_2_plotprofiles			Variable 1	Variable 2
008_dorsal_2_plotprofiles	0.336	-0.08	002_cortical_3_plotprofiles		Mean	0.261143	0.0135758
010_dorsal_1_plotprofiles	0.256	0.096	002_cortical_4_plotprofiles		Variance	0.00201981	0.00232194
012_dorsal_1_plotprofiles	0.256	0.016	003_cortical_1_plotprofiles		Observations	7	33
017_dorsal_1_plotprofiles	0.288	0.048	003_cortical_2_plotprofiles		df	6	32
160920_017_dorsal_1_plotprofiles	0.224	-0.016	003_cortical_3_plotprofiles		F	0.86988
		0.064	004_cortical_1_plotprofiles		P(F<=f) one-tail	0.472415
		0.08	004_cortical_2_plotprofiles		F Critical one-tail	0.263175
		0.064	004_cortical_3_plotprofiles
		-0.016	006_cortical_1_plotprofiles		t-Test: Two-Sample Assuming Equal Variances
		-0.016	006_cortical_2_plotprofiles
		-0.032	006_cortical_3_plotprofiles			Variable 1	Variable 2
		0.048	007_cortical_1_plotprofiles		Mean	0.261143	0.0135758
		-0.032	007_cortical_2_plotprofiles		Variance	0.00201981	0.00232194
		0.032	007_cortical_3_plotprofiles		Observations	7	33
		0.048	008_cortical_1_plotprofiles		Pooled Variance	0.00227423
		0.016	008_cortical_2_plotprofiles		Hypothesized Mean Difference	0
		0.032	008_cortical_3_plotprofiles		df	38
		-0.064	008_cortical_4_plotprofiles		t Stat	12.4753
		0.032	010_cortical_1_plotprofiles		P(T<=t) one-tail	2.60767e-15
		0.064	010_cortical_2_plotprofiles		t Critical one-tail	1.68595
		-0.016	011_cortical_1_plotprofiles		P(T<=t) two-tail	5.21535e-15
		0	012_cortical_1_plotprofiles		t Critical two-tail	2.02439
		-0.064	012_cortical_2_plotprofiles
		-0.016	013_cortical_1_plotprofiles
		0.016	014_cortical_1_plotprofiles
		-0.048	014_cortical_2_plotprofiles
		-0.032	014_cortical_3_plotprofiles
		0.128	014_cortical_4_plotprofiles
		0.016	015_cortical_1_plotprofiles
		0.016	015_cortical_2_plotprofiles
		0.048	019_cortical_1_plotprofiles
Average	0.261143	0.0135758
SEM	0.0169866	0.00838819
STDEV	0.0449423	0.0481865

## Sheet: 002_cortical_1_plotprofiles
		Dist. (nm)
	Time(s)	0	0.08	0.16	0.24	0.32	0.4	0.48	0.56	0.64	0.72	0.8	0.88	0.96	1.04	1.12	1.2	1.28	1.36	1.44	1.52	1.6	1.68	1.76	1.84	1.92	2	2.08	2.16	2.24	2.32	2.4	2.48	2.56	2.64	2.72	2.8	2.88	2.96	3.04	3.12	3.2	3.28	3.36	3.44	3.52	3.6	3.68	3.76
	0	153	173	180	164	137	136	165	184	145	168	179	166	159	163	131	161	188	174	195	200	199	230	249	255	255	247	195	179	201	201	226	182	175	149	161	153	174	182	194	156	156	138	146	176	223	203	206	206
	10	152	146	109	110	150	202	242	210	175	183	164	163	201	222	168	161	183	203	219	218	210	232	246	251	251	249	225	203	243	246	208	177	170	184	212	187	201	177	168	153	153	154	204	242	257	236	196	143
	20	156	204	232	235	259	204	189	169	138	138	184	238	349	503	538	654	737	596	579	602	607	878	1219	1478	1478	1827	2123	2352	2450	2294	2775	2718	2436	2356	2111	2089	2221	2103	1973	1500	1500	1225	606	559	529	543	489	411
	30	154	154	138	139	159	156	192	195	155	145	155	153	224	246	234	385	555	516	501	529	552	754	1178	1564	1564	1945	2014	2044	1930	1800	2004	1955	2012	2391	2324	2178	2070	2176	2113	1380	1380	1066	540	413	395	345	439	503
	40	174	171	177	181	183	184	200	213	162	151	137	115	154	234	252	296	363	371	494	576	555	690	866	1166	1166	1375	1678	1970	2218	2257	2301	2224	2039	2126	2047	2131	2139	1965	1749	1236	1236	1342	684	515	374	250	352	404
	50	136	139	130	113	105	133	181	233	160	149	152	130	181	229	235	259	291	231	291	396	465	762	1055	970	970	1199	1240	1544	1949	2200	2381	2407	2099	1800	1898	1934	1827	1849	1802	1203	1203	1220	706	590	462	259	278	311
	60	119	112	135	162	179	145	148	195	142	160	170	157	177	204	168	194	270	237	332	460	408	550	757	679	679	821	1003	1575	1932	2079	1870	1833	1690	1652	1657	1692	1344	1380	1364	1115	1115	1151	820	718	558	338	349	369
	70	131	128	148	178	165	136	104	123	99	126	179	156	175	221	178	204	232	158	207	316	331	404	550	700	700	976	1385	1741	1849	1733	1502	1558	1551	1762	1550	1385	1296	1434	1406	968	968	1037	785	583	404	192	229	320
	80	126	109	110	114	122	122	136	163	102	109	110	107	142	182	137	137	162	168	341	591	557	718	830	714	714	955	1097	1636	1885	1859	1804	1682	1513	1386	1268	1258	1153	1312	1244	917	917	1045	755	658	489	290	304	295
	90	160	156	115	100	90	97	139	201	131	148	148	121	144	174	189	223	265	188	239	358	356	525	574	635	635	946	1394	1781	1657	1600	1775	1801	1544	1408	1426	1393	1173	946	968	794	794	917	672	644	515	279	306	329
	100	180	141	97	100	111	111	139	159	141	155	153	138	174	236	194	163	172	231	310	445	375	563	822	875	875	1221	1528	1800	1798	1657	1387	1360	1371	1468	1475	1458	1115	1168	1208	801	801	841	538	495	428	317	314	328
	110	128	126	116	118	143	155	157	183	126	126	143	91	103	135	154	189	226	206	265	385	320	551	836	992	992	1057	1154	1358	1725	1753	1907	1505	1197	1208	1166	1317	1263	1403	1532	963	963	961	638	606	523	402	361	301
	120	120	119	104	99	119	135	213	221	161	129	93	75	110	141	113	141	219	206	255	330	305	532	812	907	907	1128	1334	1509	1667	1702	1520	1291	1097	1163	1282	1363	1309	1305	1395	894	894	970	693	674	558	359	327	333
	130	174	166	127	129	142	139	195	240	166	176	162	124	147	175	150	160	175	182	267	342	298	408	556	666	666	790	1075	1438	1941	2055	1844	1636	1265	1095	1113	1301	1277	1308	1340	830	830	1000	599	634	525	367	351	326
	140	99	105	125	148	186	174	180	157	116	130	133	139	136	129	146	207	302	244	196	185	199	317	502	443	443	677	852	1286	1705	1707	1554	1285	1128	1099	1134	1223	1421	1291	1228	740	740	841	557	610	586	373	317	295
	150	113	119	105	105	99	102	109	134	131	123	130	91	102	141	183	262	297	212	180	204	275	423	562	477	477	705	753	1067	1321	1400	1304	1318	1168	1116	1066	1044	1084	1034	973	588	588	693	578	624	578	341	335	333
	160	110	133	137	110	105	111	104	117	120	131	144	131	136	152	146	161	218	172	168	194	183	280	378	346	346	509	561	892	1014	1173	1217	1405	1416	1045	1077	1085	1091	1196	1110	622	622	618	349	478	430	290	351	369
	170	158	131	125	116	138	125	117	102	105	106	127	153	186	217	213	219	241	173	195	197	137	193	308	390	390	501	517	779	1021	1277	1138	1227	1160	867	823	930	940	929	878	641	641	689	485	491	405	282	311	276
	180	108	108	101	84	68	98	128	182	171	148	144	89	103	119	112	163	185	151	179	208	166	226	348	362	362	528	629	895	1114	1368	1328	1220	1148	1044	1038	1044	941	927	956	523	523	487	392	543	483	332	317	353
	190	113	110	107	103	106	108	118	108	103	100	107	83	84	102	112	163	222	215	251	270	197	279	387	418	418	581	730	919	1095	1069	978	990	1033	880	854	881	798	835	871	613	613	613	366	351	366	291	307	299
	200	144	160	142	104	95	111	129	145	152	141	144	92	111	147	155	160	172	165	193	226	206	349	456	396	396	467	581	894	1198	1174	1048	896	949	1027	990	891	859	1017	1139	666	666	643	315	358	363	300	375	365
	210	138	115	136	132	126	121	142	141	135	138	127	113	115	111	103	162	255	271	291	278	235	264	338	332	332	559	641	1019	1321	1500	1170	995	833	829	822	789	799	798	825	658	658	811	590	538	383	298	245	214
	220	156	145	120	103	108	110	150	151	137	111	95	97	127	128	134	171	177	145	168	241	212	298	392	355	355	482	444	724	1013	1145	1085	1012	948	834	738	663	713	808	863	694	694	694	479	496	431	308	291	280
	230	142	125	108	117	124	124	131	125	132	110	114	94	107	107	101	116	144	166	221	302	212	209	217	209	209	304	369	712	1090	1331	1068	849	822	787	839	753	586	544	647	554	554	662	476	551	559	290	230	197
	240	121	114	91	97	110	117	146	154	141	141	131	112	134	153	126	107	129	146	185	221	178	205	280	266	266	390	284	465	808	1165	969	923	788	692	727	737	663	647	621	500	500	398	268	347	512	441	392	246
	250	177	150	112	107	127	117	142	156	143	140	132	117	117	133	115	119	163	173	196	199	150	188	244	290	290	407	436	626	862	1083	862	856	821	586	513	489	504	476	441	432	432	418	337	425	483	318	328	266
	260	165	180	179	160	138	98	113	115	115	122	123	135	159	146	85	92	132	180	237	226	115	113	189	263	263	372	318	484	661	814	810	886	891	764	699	707	597	616	589	483	483	504	515	515	445	323	300	232
	270	127	132	142	163	187	126	133	141	152	141	128	104	106	122	112	116	142	148	159	190	156	189	243	258	258	414	401	551	765	843	660	646	665	588	585	505	578	604	590	498	498	474	340	408	473	375	305	234
	280	167	163	140	119	114	98	122	148	178	198	164	111	98	94	101	106	144	188	222	247	131	154	232	236	236	374	330	489	680	965	928	933	847	622	681	622	603	598	548	395	395	383	325	366	367	258	221	172
	290	104	106	125	127	133	133	135	122	98	88	98	102	120	126	99	110	167	202	230	226	120	159	293	379	379	522	508	594	735	779	768	787	726	560	575	542	401	441	495	342	342	358	320	346	346	247	200	161
(5min)	300	119	136	147	149	145	116	108	89	105	108	131	139	143	124	104	111	148	166	217	230	147	163	229	225	225	311	375	592	804	869	774	765	757	652	616	537	377	378	510	486	486	498	379	409	433	321	231	153
[truncated: 16 more columns]

## Sheet: 002_cortical_2_plotprofiles
		Dist. (nm)
	Time(s)	0	0.08	0.16	0.24	0.32	0.4	0.48	0.56	0.64	0.72	0.8	0.88	0.96	1.04	1.12	1.2	1.28	1.36	1.44	1.52	1.6	1.68	1.76	1.84	1.92	2	2.08	2.16	2.24	2.32	2.4	2.48	2.56	2.64	2.72	2.8	2.88	2.96	3.04	3.12	3.2	3.28	3.36	3.44	3.52	3.6	3.68	3.76
	0	163	126	106	129	129	120	140	130	150	161	139	136	138	134	149	140	159	148	198	289	268	218	157	160	151	144	153	174	241	241	223	201	240	262	262	213	179	212	192	164	164	154	140	138	131	154	141	179
	10	140	111	95	122	150	143	149	132	107	104	137	150	152	127	124	119	131	141	171	220	215	235	202	211	160	167	202	174	198	198	231	194	187	193	193	184	179	143	125	126	126	144	136	151	184	206	166	186
	20	125	101	113	154	151	126	128	118	128	124	133	130	136	135	142	172	243	194	289	402	543	679	568	694	878	1335	2112	1877	1914	1914	2180	1576	1709	1751	1751	1573	1125	968	932	871	871	695	437	499	379	414	314	382
	30	131	102	100	112	124	118	131	132	129	156	153	193	159	162	154	112	120	116	177	375	498	686	693	612	843	1212	1497	1433	1758	1758	1889	1511	1706	2008	2008	1509	1250	770	627	680	680	757	657	739	400	388	246	377
	40	143	115	124	126	143	130	138	139	106	97	85	102	106	138	140	140	149	147	196	339	506	618	584	459	498	854	1523	1667	1738	1738	1921	1602	1749	1712	1712	1288	1196	1346	1412	1157	1157	858	644	728	502	525	385	470
	50	136	126	114	118	110	128	131	120	126	129	114	109	92	101	136	147	123	120	138	268	432	464	444	401	520	763	1238	1571	1791	1791	1641	1350	1419	1570	1570	1508	1428	1239	1199	913	913	680	429	512	394	502	347	519
	60	152	120	114	109	127	121	132	121	122	125	128	126	144	149	143	116	119	116	138	189	250	321	454	454	521	692	1002	1240	1426	1426	1474	1237	1142	1430	1430	1439	1644	1071	1121	1015	1015	713	456	556	506	507	257	264
	70	111	110	119	129	126	117	133	123	105	109	110	126	113	128	113	103	108	128	113	129	198	355	409	391	447	675	935	1110	1467	1467	1511	1131	1110	1155	1155	1053	1007	1020	950	857	857	613	469	573	508	531	375	386
	80	111	67	65	79	105	120	95	117	145	150	136	124	116	133	124	131	112	96	85	137	254	348	391	365	471	600	730	812	1009	1009	1190	868	876	1192	1192	1291	1032	822	816	926	926	673	493	557	397	433	327	341
	90	93	92	94	107	116	113	99	114	131	106	99	106	111	131	123	107	110	113	111	134	176	316	487	532	618	643	724	772	970	970	1124	942	980	1207	1207	1153	1052	880	841	774	774	621	455	597	524	627	403	543
	100	117	96	102	123	124	103	102	117	122	128	141	134	137	112	96	120	126	109	118	136	174	360	508	555	569	592	630	804	1027	1027	906	733	835	1085	1085	1207	1146	892	871	717	717	695	508	575	352	392	286	350
	110	84	89	106	121	133	92	108	130	144	144	98	92	112	125	134	135	132	131	108	120	157	338	447	594	591	560	597	714	1055	1055	1186	998	938	1167	1167	1234	1217	866	704	685	685	669	670	596	375	390	284	386
	120	120	105	111	119	120	110	117	154	150	159	125	132	134	135	109	91	107	99	104	100	156	231	345	385	468	475	522	661	1119	1119	1097	744	839	1131	1131	1251	1197	904	566	564	564	529	475	530	353	404	287	392
	130	117	99	106	121	124	134	140	120	106	121	104	88	94	103	124	101	121	117	131	119	134	206	332	344	431	483	436	752	1161	1161	1118	803	697	874	874	1061	1051	953	783	785	785	673	601	554	358	387	323	383
	140	96	109	122	126	111	111	146	132	114	110	113	122	91	101	106	119	122	116	92	99	142	205	286	234	240	303	221	300	606	606	819	973	709	827	827	859	982	828	889	768	768	477	316	401	318	350	240	294
	150	122	93	93	110	124	103	128	121	149	140	121	123	122	130	118	86	106	110	133	127	127	126	147	186	230	306	398	544	657	657	849	1084	828	666	666	755	806	730	674	693	693	556	376	501	467	542	365	539
	160	113	106	102	106	134	134	127	136	121	116	114	132	133	130	145	142	173	138	161	125	142	138	178	165	208	301	272	289	475	475	742	974	772	604	604	651	730	695	742	558	558	372	273	343	276	402	270	386
	170	150	127	111	117	124	139	147	143	125	127	100	117	124	147	146	105	118	98	121	125	144	142	187	199	302	374	382	398	508	508	734	893	737	582	582	587	517	601	617	582	582	352	251	294	327	388	338	380
	180	120	97	96	102	122	141	131	133	110	97	98	134	116	126	108	123	134	121	121	109	122	142	177	217	339	449	321	442	630	630	851	1018	635	592	592	516	514	653	708	611	611	389	363	420	331	410	252	324
	190	141	94	91	82	111	122	128	141	133	127	122	112	124	142	155	153	143	124	137	129	154	155	202	204	257	341	447	541	636	636	830	820	740	659	659	600	555	483	479	619	619	500	329	321	330	411	314	461
	200	109	106	117	117	118	119	153	144	132	149	134	124	115	116	142	123	133	122	171	177	167	160	167	174	260	331	348	437	587	587	820	740	499	520	520	632	597	578	589	784	784	572	407	487	447	474	328	400
	210	129	112	111	93	86	106	114	123	144	136	110	100	88	97	105	109	94	110	100	89	103	122	131	152	205	336	417	588	718	718	913	953	689	475	475	587	555	743	653	567	567	488	423	437	363	434	280	361
	220	121	126	116	106	119	121	137	137	117	101	110	126	153	156	161	141	138	144	132	119	123	136	163	147	176	341	390	472	511	511	581	658	491	401	401	548	638	708	629	656	656	526	372	423	313	369	271	395
	230	120	120	108	96	96	125	141	123	103	114	145	161	160	166	184	144	151	135	162	131	130	151	180	184	180	230	261	381	385	385	563	684	732	591	591	557	590	499	621	673	673	591	426	426	306	325	207	269
	240	137	122	118	101	107	90	92	95	111	110	122	123	123	133	131	135	130	120	108	103	116	140	186	201	225	278	290	339	293	293	450	625	698	603	603	463	455	501	583	618	618	440	322	309	191	198	156	220
	250	117	102	88	94	103	139	138	132	106	111	143	134	129	118	125	130	141	146	133	108	95	117	188	189	218	251	260	408	447	447	493	726	788	785	785	600	580	626	572	567	567	312	164	231	232	322	241	272
	260	127	129	143	117	114	112	101	94	104	120	134	145	143	140	126	112	121	112	147	149	155	136	130	145	158	199	316	404	329	329	354	511	720	742	742	488	378	484	550	497	497	408	289	321	219	279	201	292
	270	115	121	122	96	105	145	158	139	116	110	111	113	127	145	116	115	119	142	116	92	106	142	177	176	196	260	290	356	414	414	576	640	559	471	471	415	369	404	407	357	357	244	222	289	275	303	249	292
	280	101	116	127	129	115	91	88	96	108	125	127	158	170	179	127	100	122	128	167	151	138	111	123	120	170	258	335	391	474	474	528	591	616	614	614	447	412	506	435	455	455	370	256	287	271	291	256	360
	290	166	113	100	92	114	131	159	165	154	114	116	120	131	115	104	109	131	124	139	117	107	101	119	127	175	237	274	378	461	461	605	753	735	552	552	519	462	471	402	317	317	301	255	259	232	279	256	397
(5min)	300	163	113	94	71	84	98	111	118	120	120	109	114	106	114	116	116	134	125	154	138	147	179	181	187	179	211	257	382	428	428	610	726	771	664	664	503	419	358	304	280	280	264	241	256	228	321	241	304
[truncated: 16 more columns]

## Sheet: 002_cortical_3_plotprofiles
		Dist. (nm)
	Time(s)	0	0.08	0.16	0.24	0.32	0.4	0.48	0.56	0.64	0.72	0.8	0.88	0.96	1.04	1.12	1.2	1.28	1.36	1.44	1.52	1.6	1.68	1.76	1.84	1.92	2	2.08	2.16	2.24	2.32	2.4	2.48	2.56	2.64	2.72	2.8	2.88	2.96	3.04	3.12	3.2	3.28	3.36	3.44	3.52	3.6	3.68	3.76
	0	171	179	208	208	169	153	173	195	200	229	238	205	181	148	174	206	179	179	168	169	195	193	215	232	224	190	161	184	182	167	167	148	200	207	183	187	148	111	133	142	146	162	137	166	166	158	136	148
	10	181	156	137	137	164	202	215	177	176	172	180	180	177	193	179	178	190	190	160	170	158	182	158	173	142	142	136	154	164	208	208	198	219	210	202	212	170	157	138	153	179	189	176	202	202	167	146	153
	20	220	208	283	283	467	363	349	302	276	369	419	493	508	391	307	242	281	281	528	683	821	810	1053	1358	1636	1555	1588	1420	1587	1841	1841	2018	2091	2207	2112	1915	1612	1291	952	808	801	658	447	324	324	364	340	252
	30	188	200	234	234	331	452	466	347	339	452	579	565	522	356	316	340	484	484	592	654	765	866	1128	1242	1437	1450	1577	1328	1532	1806	1806	1976	2141	1894	2048	1941	1608	1090	660	468	497	309	303	462	462	455	316	211
	40	205	227	313	313	471	405	392	381	357	413	521	575	551	452	446	368	444	444	777	825	886	927	1020	1334	1741	1566	1666	1590	1532	1770	1770	1978	2043	1626	1293	1318	1031	793	428	306	403	378	413	466	466	374	267	175
	50	207	205	310	310	459	440	361	297	307	420	450	357	379	368	366	369	432	432	522	516	671	939	1132	1379	1455	1357	1458	1329	1600	1584	1584	1670	1841	1314	1134	1295	672	315	193	261	425	379	347	232	232	168	143	149
	60	169	142	194	194	318	340	290	312	259	330	472	491	477	365	321	341	466	466	644	600	846	1137	1053	1063	1325	1052	1566	1388	1319	1298	1298	1403	1759	1059	866	860	501	345	240	252	405	283	248	223	223	156	129	122
	70	167	186	246	246	287	343	319	320	274	333	461	562	553	481	413	326	467	467	577	550	684	827	858	1032	1265	1113	1450	1434	1473	1512	1512	1587	1655	1123	813	613	379	350	258	312	365	283	243	195	195	146	114	116
	80	176	198	288	288	332	364	299	302	260	290	304	345	374	350	315	273	310	310	435	540	787	766	894	1049	1469	1456	1512	1519	1274	1221	1221	1461	1522	946	588	574	367	415	313	316	409	256	197	201	201	169	119	110
	90	161	175	217	217	311	293	288	267	288	302	379	383	391	330	347	317	432	432	640	705	846	828	971	1288	1625	1327	1577	1322	1241	1338	1338	1563	1502	986	655	639	470	442	388	365	467	379	265	179	179	149	139	113
	100	226	194	242	242	315	269	230	222	195	259	449	467	452	350	269	251	355	355	543	638	835	918	996	1086	1509	1416	1614	1622	1452	1397	1397	1437	1461	923	678	659	448	454	384	320	377	271	266	194	194	121	86	94
	110	186	165	199	199	243	280	304	269	274	289	411	406	449	302	218	239	369	369	603	660	787	927	1002	1149	1248	1172	1179	1148	1291	1357	1357	1545	1406	854	513	558	374	383	273	309	359	205	146	121	121	116	124	121
	120	183	179	253	253	222	236	245	294	297	350	410	383	351	310	258	225	361	361	577	656	799	925	943	1265	1395	1134	1499	1119	1004	997	997	1196	976	535	445	540	394	420	299	254	347	212	163	224	224	179	158	164
	130	288	234	203	203	249	282	279	281	270	264	281	250	267	252	267	220	300	300	553	632	863	1176	1054	1282	1251	824	1012	769	907	1313	1313	1209	894	469	365	497	332	394	221	165	244	156	142	142	142	124	130	132
	140	198	231	253	253	250	248	256	317	271	222	209	237	296	338	249	279	487	487	693	509	644	998	900	1102	1109	687	954	567	660	849	849	875	662	372	322	395	295	309	218	161	173	115	152	146	146	139	191	205
	150	207	183	198	198	224	239	207	260	284	383	402	364	453	304	221	220	376	376	573	544	657	978	769	967	894	637	1043	791	683	749	749	564	449	313	309	455	263	273	189	227	244	180	160	131	131	118	152	151
	160	279	241	230	230	240	278	240	259	199	235	325	259	340	250	198	284	371	371	512	508	763	1185	974	974	729	431	617	412	597	656	656	610	401	252	216	266	210	211	150	169	229	202	188	162	162	149	120	121
	170	155	144	180	180	260	277	256	268	235	268	311	268	295	268	215	256	391	391	698	649	736	1008	765	854	888	626	795	586	614	794	794	675	583	339	328	354	209	176	160	170	186	149	165	152	152	127	146	142
	180	254	220	196	196	163	196	205	231	253	295	353	358	380	265	233	320	414	414	634	714	928	1110	906	779	1010	782	935	743	812	690	690	597	608	490	472	483	299	196	159	172	201	168	166	168	168	188	176	160
	190	222	196	174	174	126	153	174	174	224	268	315	294	334	308	216	213	373	373	597	696	832	959	1030	1032	913	712	793	696	723	804	804	779	671	547	404	338	255	293	246	190	189	158	175	216	216	186	188	165
	200	152	142	124	124	126	145	214	225	249	311	442	444	487	412	320	335	460	460	673	740	851	904	992	968	952	739	860	854	884	817	817	723	671	530	414	363	271	251	210	207	210	208	216	176	176	202	182	171
	210	216	232	198	198	179	206	244	256	238	319	404	362	432	403	314	281	381	381	483	475	692	846	831	808	793	744	892	791	861	865	865	837	622	453	387	332	264	332	251	200	205	143	154	219	219	238	179	157
	220	225	192	179	179	190	225	260	292	262	272	325	306	449	468	392	361	353	353	463	555	734	928	843	737	665	552	778	722	979	1067	1067	804	531	297	234	238	227	348	268	184	201	150	195	264	264	218	119	113
	230	192	192	162	162	152	227	226	280	241	292	374	315	355	295	237	357	445	445	584	542	750	886	689	640	700	498	822	611	665	785	785	664	481	281	191	248	213	223	165	156	173	187	219	170	170	143	148	149
	240	186	184	207	207	168	188	180	288	252	315	389	365	418	314	217	215	355	355	658	544	703	830	511	507	586	396	732	542	670	697	697	646	386	247	226	265	208	204	152	192	219	196	161	154	154	155	142	106
	250	172	191	208	208	202	183	162	185	201	309	367	251	289	336	266	305	356	356	638	591	668	898	639	526	566	383	616	579	709	632	632	518	366	206	177	208	166	226	217	214	207	189	162	162	162	142	124	128
	260	169	142	198	198	208	211	227	252	234	303	383	348	416	364	255	276	328	328	593	596	757	889	625	628	670	518	737	548	726	686	686	376	230	181	226	217	198	209	186	191	216	185	148	127	127	133	132	143
	270	171	160	189	189	180	132	125	145	183	297	432	377	501	330	223	283	407	407	603	593	773	927	828	559	510	474	695	652	693	648	648	473	344	230	221	230	207	206	183	161	157	141	162	184	184	189	202	164
	280	173	218	237	237	233	206	194	198	190	272	408	420	526	474	371	315	341	341	486	556	723	676	710	668	713	693	818	654	588	688	688	652	398	277	243	250	242	270	212	173	158	156	177	176	176	161	169	150
	290	173	172	191	191	210	178	177	180	163	289	417	370	396	400	343	280	248	248	519	634	868	753	703	567	616	654	732	669	555	591	591	444	284	198	204	258	226	196	187	177	178	182	171	184	184	201	173	155
(5min)	300	164	187	194	194	171	154	170	177	173	244	367	397	488	545	466	289	262	262	514	576	729	706	624	745	552	472	639	554	556	512	512	437	322	314	354	347	279	215	158	186	219	214	174	131	131	148	174	185
[truncated: 16 more columns]

## Sheet: 002_cortical_4_plotprofiles
		Dist. (nm)
	Time(s)	0	0.08	0.16	0.24	0.32	0.4	0.48	0.56	0.64	0.72	0.8	0.88	0.96	1.04	1.12	1.2	1.28	1.36	1.44	1.52	1.6	1.68	1.76	1.84	1.92	2	2.08	2.16	2.24	2.32	2.4	2.48	2.56	2.64	2.72	2.8	2.88	2.96	3.04	3.12	3.2	3.28	3.36	3.44	3.52	3.6	3.68	3.76
	0	128	128	132	116	99	104	103	95	114	107	106	103	97	97	114	131	153	120	106	94	105	124	139	150	155	155	193	210	208	175	168	193	190	217	212	194	168	152	121	129	150	158	190	190	218	190	161	154
	10	124	124	115	124	113	110	107	135	130	125	132	156	137	137	109	106	132	154	149	129	129	111	124	146	177	177	160	179	203	206	221	220	193	174	193	235	206	200	175	195	175	172	184	184	158	160	174	175
	20	154	154	159	142	146	152	145	134	151	137	140	136	119	119	112	129	200	269	300	370	326	275	230	426	824	824	1384	1583	2119	2278	2631	2753	2735	2423	2072	1757	1457	1320	1219	1464	972	727	531	531	573	651	551	325
	30	121	121	122	122	96	120	153	156	186	170	144	117	121	121	138	126	158	198	201	241	227	215	204	334	616	616	1064	1531	1701	1717	2201	2245	2550	2665	2352	1615	1478	1205	942	1270	837	781	479	479	453	589	553	365
	40	119	119	164	159	145	123	118	133	130	144	151	153	121	121	123	133	176	217	233	249	306	346	267	275	298	298	775	1249	1900	2040	2192	1955	2477	2173	2065	1477	1559	1081	885	1129	887	795	645	645	462	635	553	417
	50	127	127	148	159	154	147	141	140	122	98	106	105	106	106	109	111	114	136	187	222	278	414	367	319	238	238	644	1150	1756	1812	1727	1470	1745	2027	2101	1709	1665	1195	797	1046	701	840	430	430	378	476	512	401
	60	112	112	135	134	124	115	119	128	128	109	119	126	130	130	125	111	123	175	192	186	202	226	207	262	294	294	507	767	1220	1351	1470	1092	1493	1823	2073	1621	1507	1075	847	1089	1009	955	522	522	318	358	471	531
	70	94	94	121	149	139	144	114	95	88	87	122	123	120	120	111	124	132	139	145	154	197	228	227	261	245	245	419	668	1154	1385	1502	1373	1627	1790	1812	1782	1511	1295	974	1117	984	989	679	679	412	475	502	396
	80	119	119	148	122	110	138	148	159	152	118	103	103	113	113	108	116	129	162	146	164	168	228	235	256	198	198	356	538	1211	1301	1420	1355	1515	1762	1720	1612	1321	1078	836	965	970	1082	614	614	406	422	459	435
	90	147	147	143	127	99	124	136	127	112	89	98	100	110	110	116	131	143	136	149	159	183	201	191	171	237	237	425	677	1305	1566	1453	1399	1330	1627	1547	1514	1248	1051	776	974	947	923	603	603	407	338	389	485
	100	144	144	161	136	107	131	137	109	110	98	107	102	91	91	74	78	107	149	157	201	247	328	256	192	183	183	327	535	1114	1388	1442	1437	1280	1595	1443	1403	1023	913	613	823	1063	1215	719	719	355	308	400	415
	110	146	146	163	180	125	86	71	78	92	119	132	126	112	112	96	97	101	139	173	198	229	253	270	223	170	170	345	639	1270	1334	1464	1367	1300	1632	1690	1716	1219	977	740	929	764	857	528	528	329	335	353	347
	120	148	148	149	120	93	88	89	83	85	92	125	133	105	105	127	117	118	139	165	175	233	268	234	191	120	120	281	590	1257	1693	1626	1393	1480	1592	1659	1392	1084	973	715	1093	965	1116	725	725	350	320	338	429
	130	125	125	127	104	99	101	101	93	97	90	92	106	95	95	108	132	129	108	96	118	138	263	282	320	230	230	261	471	1042	1267	1487	1347	1466	1655	1785	1490	1095	942	544	702	797	1086	676	676	350	357	416	409
	140	99	99	89	130	112	103	108	119	124	129	118	113	112	112	96	97	112	105	107	94	113	203	229	245	178	178	165	252	693	1222	1791	1447	1722	1672	1709	1683	1286	1118	573	598	513	767	770	770	435	460	256	289
	150	132	132	118	85	82	91	121	114	130	129	106	116	113	113	115	110	107	131	118	129	146	158	204	307	254	254	198	195	463	820	1466	1323	1479	1398	1424	1797	1631	1433	868	818	552	848	739	739	559	501	269	188
	160	110	110	106	95	99	114	119	123	132	121	109	119	125	125	119	99	101	150	169	204	208	208	222	204	200	200	236	277	421	700	1116	919	1116	1282	1529	1427	1254	1183	821	716	552	634	622	622	435	510	271	167
	170	161	161	154	115	94	94	117	104	129	123	113	122	100	100	101	115	138	113	116	128	137	178	183	210	234	234	233	248	434	679	1145	1062	1234	1082	1036	1173	1050	1093	645	541	519	811	827	827	682	643	347	206
	180	146	146	143	116	99	112	114	124	120	110	116	116	91	91	85	102	128	151	152	130	107	131	185	222	240	240	211	264	448	662	1095	1049	1235	1154	1006	1066	814	991	605	594	706	967	921	921	594	574	388	268
	190	92	92	111	109	98	98	94	107	111	129	138	133	120	120	125	108	98	118	133	139	157	196	230	267	220	220	155	169	416	601	982	1031	900	806	781	1183	858	1014	801	700	743	950	1020	1020	723	636	373	248
	200	123	123	122	116	108	106	121	106	116	132	158	146	137	137	120	121	135	114	113	119	127	162	160	209	256	256	283	249	352	463	847	909	911	1014	854	1124	948	1048	828	765	852	915	927	927	730	692	459	314
	210	125	125	138	140	129	134	102	124	99	83	108	116	101	101	109	111	132	123	122	112	115	113	109	144	194	194	213	223	356	532	1035	1234	1410	1169	913	1141	909	1007	633	725	761	798	926	926	697	698	499	297
	220	134	134	198	169	139	121	126	128	129	142	118	110	113	113	96	102	99	129	141	144	160	117	105	144	175	175	189	199	287	434	842	872	1216	1234	1198	1319	1224	1360	861	711	681	878	800	800	683	692	494	279
	230	128	128	161	145	110	118	141	137	125	109	90	95	108	108	120	122	109	142	141	148	151	166	157	162	194	194	213	214	293	399	775	726	930	907	934	1217	1141	1255	815	713	540	620	768	768	678	723	433	340
	240	131	131	131	136	128	119	113	115	125	132	108	107	117	117	125	145	128	88	72	91	113	149	166	167	160	160	165	215	306	346	566	608	920	949	952	936	884	974	1030	870	626	672	810	810	716	788	491	312
	250	97	97	138	142	129	136	147	125	119	98	116	126	120	120	132	116	102	91	114	114	152	142	153	167	206	206	205	235	257	296	475	545	809	911	952	878	776	1036	1015	789	439	495	753	753	711	768	539	395
	260	133	133	135	120	120	130	126	132	131	101	103	108	106	106	115	109	105	101	113	108	119	118	133	155	157	157	170	196	208	215	489	732	1031	1160	1092	691	578	618	624	760	604	577	593	593	659	811	606	407
	270	106	106	130	141	123	106	96	96	88	95	94	111	99	99	105	120	116	112	126	115	116	127	136	172	184	184	198	187	229	291	555	690	896	980	896	872	729	862	941	784	503	522	785	785	861	844	592	384
	280	96	96	111	114	105	93	101	122	123	120	110	100	125	125	113	116	107	127	126	140	124	119	114	106	138	138	154	163	209	254	514	764	923	978	795	681	533	747	896	670	490	546	883	883	975	886	656	391
	290	118	118	142	115	115	139	138	122	109	90	119	152	127	127	104	107	122	113	113	115	121	128	115	137	191	191	261	243	236	219	463	696	931	941	768	727	588	752	704	573	585	705	1024	1024	744	611	462	334
(5min)	300	131	131	156	135	102	105	118	112	108	98	110	114	124	124	167	183	162	112	104	114	143	143	132	135	165	165	251	313	283	257	429	642	766	1070	929	805	651	930	859	737	551	630	871	871	958	849	620	406
[truncated: 16 more columns]

## Sheet: 003_cortical_1_plotprofiles
		Dist. (nm)
	Time(s)	0	0.08	0.16	0.24	0.32	0.4	0.48	0.56	0.64	0.72	0.8	0.88	0.96	1.04	1.12	1.2	1.28	1.36	1.44	1.52	1.6	1.68	1.76	1.84	1.92	2	2.08	2.16	2.24	2.32	2.4	2.48	2.56	2.64	2.72	2.8	2.88	2.96	3.04	3.12	3.2	3.28	3.36	3.44	3.52	3.6	3.68	3.76
	0	272	271	227	223	232	253	213	207	194	227	227	245	261	195	195	204	212	253	233	256	305	382	335	389	488	586	586	697	666	643	584	590	602	529	485	469	476	570	570	583	526	546	527	506	439	498	530	575
	10	284	278	274	215	197	199	212	214	243	294	294	293	207	189	189	221	240	285	263	317	356	369	406	465	543	613	613	771	822	731	686	535	488	464	483	436	490	556	556	512	519	485	509	474	482	443	488	479
	20	503	462	429	390	384	386	394	431	409	427	427	468	445	418	418	449	548	731	732	665	717	884	1295	1780	3243	6311	6311	10220	13845	12933	15230	15437	14506	13857	13108	12896	12018	11052	11052	9744	7777	6427	6213	5027	4282	3297	2703	2366
	30	458	445	470	455	392	304	267	293	401	554	554	559	545	473	473	444	529	599	636	798	778	1023	1494	1948	3522	6356	6356	9776	13980	12648	16370	15474	13598	12605	12972	12345	11558	10846	10846	10078	8179	6193	5906	4241	3713	2910	2748	2271
	40	605	481	455	357	354	389	365	320	387	503	503	576	494	440	440	480	530	549	548	734	755	1003	1591	1892	3457	6557	6557	10372	13958	12339	14930	14226	12603	12657	13103	11780	10780	10092	10092	9428	7698	6153	6096	4706	3684	2963	2845	2241
	50	509	420	428	272	252	288	335	327	476	594	594	598	548	551	551	434	474	554	482	600	763	941	1271	1632	3371	5903	5903	9692	12793	11822	14567	14577	12734	12230	13114	11532	11230	9982	9982	8803	7436	5902	6086	5271	4245	3207	2822	2262
	60	550	456	494	376	319	385	409	436	491	537	537	635	547	427	427	436	511	578	647	621	673	822	1045	1347	3033	5775	5775	10193	13277	12390	15149	14614	13312	12865	12631	12188	11324	10237	10237	9896	8798	7147	6547	4616	3876	3178	2708	2433
	70	446	398	436	439	378	405	439	463	457	480	480	479	458	474	474	482	505	481	416	509	575	884	1045	1600	2919	5223	5223	8716	12545	11814	12973	13490	13239	13502	12571	12034	11527	10118	10118	8766	7528	6867	6564	4611	4036	2765	2216	2150
	80	473	384	509	427	334	296	325	312	453	672	672	576	464	419	419	435	481	610	486	469	558	716	722	1218	2421	4448	4448	7477	10891	11968	12636	12626	12332	12370	11166	11712	11112	10013	10013	8372	7166	7309	6089	4754	4915	3354	2186	2379
	90	383	358	476	451	412	373	371	317	352	479	479	525	544	523	523	428	430	481	392	326	462	596	664	1281	2110	3565	3565	6186	9818	10148	11493	11300	11501	11409	10517	11150	10494	9687	9687	8347	7436	7621	5944	4342	4552	3354	2392	2661
	100	352	331	382	469	484	357	353	380	445	437	437	454	509	433	433	391	507	637	513	418	539	673	678	1057	1903	3581	3581	5829	8617	9387	11161	12015	11498	11432	11138	11222	10234	9669	9669	8757	7231	7546	5583	4636	4802	3929	2706	2716
	110	484	513	599	405	301	320	393	455	399	387	387	453	535	536	536	479	495	608	577	503	513	531	610	941	1937	3742	3742	7172	9740	9484	10919	10743	10361	9867	9640	9913	9752	9442	9442	8469	7468	7306	6188	4682	4351	3199	2524	2349
	120	381	403	506	458	324	309	333	337	360	441	441	499	411	416	416	507	485	500	472	469	465	681	845	1183	2454	4426	4426	6617	9060	9143	11375	11654	9938	8920	9275	8361	8229	8779	8779	8379	7115	6197	5314	4440	3989	2979	2552	2297
	130	409	381	461	395	304	287	354	314	379	540	540	452	441	424	424	432	511	518	504	501	461	703	932	1366	2474	4497	4497	6899	9738	8952	10919	10455	8469	8374	9288	8100	9206	9188	9188	8380	7178	5998	5624	4484	3578	2863	2775	2362
	140	436	278	318	321	281	337	381	315	365	556	556	490	351	333	333	376	486	519	597	546	572	609	750	1146	2369	4546	4546	6958	8777	8328	9821	10222	9413	9446	10162	9075	8719	8675	8675	7581	7049	6196	5797	4401	3743	3088	2388	2248
	150	415	420	438	396	359	362	398	459	515	520	520	538	475	366	366	366	673	816	709	521	515	525	633	1098	2287	4010	4010	6243	8442	8541	9893	9919	9272	9339	9474	9210	9189	8530	8530	8492	6582	6291	5196	4492	4310	3251	2579	2268
	160	360	346	459	431	392	325	331	364	454	508	508	447	490	395	395	418	529	635	546	474	493	417	404	716	1701	3597	3597	5901	8541	9250	9383	9752	9305	9842	9683	9878	8843	7779	7779	7224	6496	6811	5124	4123	4249	3515	2547	2375
	170	389	341	409	364	325	347	341	295	304	348	348	365	466	452	452	401	433	514	454	538	596	439	333	559	1313	2635	2635	4656	7242	8854	8856	9268	9501	9471	8618	8744	8365	8007	8007	7391	6192	6621	4639	4003	4626	4013	2673	2774
	180	414	339	355	383	359	287	273	250	275	359	359	431	373	318	318	319	393	515	424	493	599	533	417	654	1230	2217	2217	3654	6041	7880	7391	8310	9240	9365	8678	8787	8643	8132	8132	7072	5849	6580	4763	4108	4981	3865	2667	2893
	190	385	336	420	416	375	327	292	266	294	361	361	376	383	442	442	421	403	443	363	432	525	497	384	477	840	1801	1801	3384	5164	7167	7036	7937	9204	9085	8067	8523	7699	7732	7732	7841	6382	7050	4671	3858	4735	3868	2683	2948
	200	407	421	376	376	328	329	365	348	394	293	293	305	385	484	484	421	333	380	397	520	517	453	456	553	1008	1927	1927	3329	5108	6591	6801	7287	7862	7878	7491	7909	7592	7446	7446	6505	5859	6516	4908	4343	5068	3970	2768	3126
	210	411	350	414	376	343	425	461	310	247	354	354	392	356	385	385	384	498	457	424	440	468	487	492	697	1029	2120	2120	4165	6116	7419	7693	8013	7755	7237	7638	7389	7791	7959	7959	6863	5749	5892	4947	4400	4905	4204	2941	2928
	220	323	233	332	418	357	296	294	223	254	396	396	455	356	373	373	448	532	562	569	571	573	565	535	671	1282	2496	2496	4489	5766	6501	7339	7579	6907	6791	7322	6587	7588	8290	8290	7781	6682	6363	5406	4287	4213	3641	2923	2768
	230	329	259	337	431	351	317	328	309	302	290	290	343	346	406	406	449	426	458	549	651	623	488	525	630	1134	2658	2658	5112	6619	6591	7669	7761	6853	6622	7546	6824	7628	8557	8557	8893	7216	6143	5484	4919	4986	3970	3176	2632
	240	293	239	319	366	351	349	325	303	285	297	297	390	505	464	464	448	495	511	571	616	651	649	546	629	947	2342	2342	4596	6304	6637	7263	7783	6896	6843	7308	7233	8282	8996	8996	8977	7774	7356	5990	4541	4581	3735	3126	3181
	250	326	330	460	565	382	356	339	332	315	343	343	354	393	340	340	388	490	539	517	484	595	706	682	703	790	1558	1558	3594	5841	6856	7398	7667	7620	6958	7632	7422	7656	8344	8344	7914	6477	6413	5256	4607	4943	4346	3357	3514
	260	374	350	421	499	410	321	281	220	229	311	311	366	371	298	298	395	471	466	436	403	503	543	476	515	647	1560	1560	3136	5007	6313	6103	7858	7985	7323	6768	6744	7518	7914	7914	7020	6339	6886	5067	4058	4949	4390	3018	3486
	270	432	397	445	363	329	310	368	318	323	338	338	355	330	382	382	531	549	548	452	345	422	492	460	615	639	1175	1175	2461	4059	5542	5877	7024	8230	7706	6619	7013	6968	7673	7673	6927	5940	6695	4698	3857	4806	4574	2887	3669
	280	346	298	365	415	348	430	435	361	399	311	311	394	457	417	417	379	397	434	378	324	395	520	449	550	596	1123	1123	2401	3840	5167	5405	6795	7599	6954	6085	6193	7141	7313	7313	6528	5892	7154	5318	4271	5070	4126	2893	3879
	290	313	287	380	388	308	271	329	271	304	408	408	406	470	410	410	354	404	445	362	368	440	570	483	641	632	1091	1091	2331	4188	5550	5984	7005	7441	6740	6130	6192	6403	7044	7044	7431	6926	6699	5257	4301	4770	3847	2898	3383
(5min)	300	346	264	356	436	383	386	425	405	322	340	340	365	407	425	425	468	551	387	365	346	423	584	519	586	669	963	963	2411	4045	5016	5801	7226	7884	7378	7131	6693	6759	7431	7431	7475	5896	6132	5220	4566	5047	4295	2883	3095
[truncated: 16 more columns]

## Sheet: 003_cortical_2_plotprofiles
		Dist. (nm)
	Time(s)	0	0.08	0.16	0.24	0.32	0.4	0.48	0.56	0.64	0.72	0.8	0.88	0.96	1.04	1.12	1.2	1.28	1.36	1.44	1.52	1.6	1.68	1.76	1.84	1.92	2	2.08	2.16	2.24	2.32	2.4	2.48	2.56	2.64	2.72	2.8	2.88	2.96	3.04	3.12	3.2	3.28	3.36	3.44	3.52	3.6	3.68	3.76
	0	167	160	154	183	232	224	195	178	186	192	208	208	176	182	220	210	220	213	251	242	255	254	357	357	458	523	490	579	602	440	420	511	509	617	651	492	537	500	433	493	574	505	470	371	371	370	482	386
	10	243	223	164	156	162	205	215	208	194	175	194	194	205	219	237	227	236	223	271	301	291	302	288	288	370	413	343	386	422	442	483	486	547	533	523	440	495	552	450	395	473	389	408	446	446	401	389	305
	20	288	301	309	321	348	283	290	336	372	413	326	326	343	402	399	393	360	393	533	754	899	1697	2620	2620	3900	5697	6119	8892	11036	11711	13858	14759	14203	12572	11187	8167	9702	8194	6450	5345	5518	4289	3662	2316	2316	1478	1125	814
	30	269	251	231	270	226	231	313	293	291	317	351	351	340	407	394	409	382	416	649	998	1145	1866	3088	3088	4985	6784	7591	9208	11811	12803	14469	14691	14271	13299	12017	9499	10218	7952	6384	5107	5354	4225	3178	2139	2139	1537	1214	799
	40	256	299	309	325	301	297	265	306	296	309	406	406	365	284	276	259	288	378	640	967	1221	2014	3463	3463	4698	6542	7043	8386	11077	12023	14187	14986	14367	13175	11759	9078	9955	7992	6143	4958	5335	4550	3848	2627	2627	1752	1432	998
	50	229	206	180	233	325	295	344	332	337	362	378	378	359	281	284	290	392	444	581	841	1090	1986	3314	3314	4836	6194	6708	8184	10803	12547	14186	14241	14492	12945	11707	9028	9742	7795	6095	5295	5342	4090	3284	2270	2270	1636	1482	961
	60	288	317	293	305	307	299	270	264	304	346	395	395	288	250	266	278	287	387	506	668	859	1535	2796	2796	4305	6020	5838	7950	10678	10899	13221	14788	13462	12725	11784	8357	10162	8473	6035	4776	5323	4075	3024	2224	2224	1774	1608	1012
	70	214	193	203	289	299	268	240	220	229	330	406	406	345	311	290	298	280	357	484	751	864	1474	2555	2555	4014	5360	4990	7222	9465	9391	11131	13975	12663	12112	10236	6419	8864	7826	5290	4427	5119	3519	2910	1917	1917	1324	998	593
	80	273	264	239	292	366	355	314	299	270	307	292	292	311	302	259	261	320	403	564	615	727	963	1777	1777	3149	5144	4355	6798	8961	7901	10024	14401	11678	10942	9399	5158	8403	7440	4724	3877	5075	3383	2179	1796	1796	1506	1147	568
	90	234	241	259	240	279	304	276	270	298	312	361	361	413	388	366	286	316	401	533	611	710	1044	1635	1635	2983	4975	4644	6826	8750	7630	9428	13311	10272	10674	9244	5141	8067	6864	4442	3686	4435	2957	2262	1730	1730	1181	1218	681
	100	337	268	264	254	278	303	297	252	261	291	358	358	303	301	351	368	340	401	452	499	619	885	1740	1740	3155	5068	4477	7011	8637	7591	9671	13345	11065	10551	8696	5060	7408	7192	4979	4285	5025	3416	2886	1947	1947	1408	1035	613
	110	229	209	200	187	202	226	250	272	300	328	261	261	283	310	311	328	342	365	530	668	917	1427	1805	1805	2992	4868	4925	6378	8381	8187	10045	12157	11350	11151	10071	6367	8031	6790	4945	4202	4860	3450	2815	2451	2451	2014	1399	815
	120	274	228	224	223	217	208	225	245	261	276	275	275	256	269	311	336	345	517	607	634	727	1252	2228	2228	3523	5526	5859	7043	7963	8290	9944	11578	11472	10741	9410	6711	8243	7068	5452	4293	4595	3670	3449	2739	2739	1879	1453	908
	130	260	232	225	181	191	254	259	307	335	368	374	374	365	250	239	283	349	386	397	588	743	1138	2076	2076	3528	4963	5624	6664	8498	10237	12185	13031	13291	11698	9606	7248	7895	7150	5903	4924	4942	4470	3971	2822	2822	1820	1301	879
	140	220	226	214	260	222	203	215	228	236	281	295	295	280	349	373	361	312	322	352	471	620	1134	2123	2123	3630	5077	5500	6976	8764	10222	12150	12977	13199	12121	10078	7629	8593	7274	5475	4382	4405	3768	3131	2159	2159	1606	1373	837
	150	246	212	203	212	204	228	215	201	231	271	309	309	361	326	301	297	282	332	409	523	507	826	1563	1563	3098	4880	5566	7183	8134	8198	10611	12505	12489	11458	10315	6975	8590	7496	5355	4482	4802	4158	3115	2485	2485	1790	1268	692
	160	237	246	247	286	270	239	245	232	255	297	318	318	296	259	263	266	265	362	392	362	478	719	1403	1403	2921	4648	4280	5875	7365	7116	9145	11542	10305	10653	9267	6081	8106	7370	4775	3554	4199	3404	3277	2248	2248	1420	994	643
	170	223	238	216	259	258	198	160	197	205	265	295	295	292	284	245	264	302	339	486	491	575	688	1073	1073	2175	3558	3342	5150	7016	6351	7349	9876	8159	8728	8155	4494	7103	5931	3504	3116	4087	2667	2298	2020	2020	1570	1186	628
	180	176	190	269	328	405	361	252	256	253	271	298	298	267	280	255	312	313	375	409	381	544	757	1099	1099	2069	3137	2687	4354	6190	5652	7437	10552	8110	8882	8231	4854	7508	6160	3752	3298	4205	2553	2304	1931	1931	1637	1219	601
	190	200	230	214	201	181	215	243	248	289	298	314	314	261	278	296	303	263	306	320	290	422	697	1293	1293	2019	3428	2998	4178	5882	5543	6885	9804	8679	9352	9103	5248	7522	6815	4185	3797	4665	3205	2808	2002	2002	1700	1370	689
	200	215	235	222	262	236	207	258	263	271	248	272	272	299	357	318	385	325	318	416	401	471	590	948	948	1846	3268	3268	4488	6018	5753	7387	9497	8924	9212	8184	5466	7467	6518	4208	3665	4411	3437	2730	2457	2457	2112	1713	932
	210	233	254	246	266	259	251	237	207	225	266	318	318	400	344	310	270	224	308	425	475	551	688	1147	1147	2051	3257	3377	4635	6503	6837	8117	8975	8988	9038	8782	6018	8019	6882	5071	4126	4415	3513	2742	2398	2398	2256	1717	968
	220	235	244	238	342	317	279	200	212	231	370	317	317	297	295	301	308	266	340	408	410	536	850	1458	1458	2572	3422	3817	4689	6563	7439	8440	9283	9098	9442	9373	7055	8683	7051	5462	4039	4057	3013	2578	2327	2327	2242	1659	969
	230	229	320	300	290	244	232	213	218	217	251	361	361	377	383	352	372	331	331	389	368	479	774	1456	1456	2480	3890	4097	5020	6040	6767	8431	9182	10036	10751	9336	7087	7954	7178	5576	4317	4345	3509	3276	2659	2659	2091	1644	1016
	240	245	324	347	369	354	294	236	228	250	307	311	311	280	324	311	351	287	365	463	393	481	646	1185	1185	2192	3715	4257	5062	6530	6981	8284	9605	9547	9962	8847	5902	7692	6755	4913	3981	4119	3052	2617	2795	2795	2490	1774	945
	250	208	216	222	299	287	238	189	166	190	293	344	344	318	329	324	365	344	321	357	391	428	624	1206	1206	2150	3250	3516	4411	5565	5807	7722	9540	9586	10251	9160	5991	7804	7009	5227	4297	4351	3066	2731	2637	2637	2456	2012	1237
	260	204	242	194	228	254	276	271	240	290	313	264	264	237	266	292	357	335	347	348	284	386	547	1041	1041	1929	3191	3029	4260	4849	4664	5998	7894	7463	8657	7944	4725	7365	6757	4423	3544	4410	2758	2223	1976	1976	2176	1901	1051
	270	181	206	208	262	247	231	210	191	207	240	248	248	243	210	202	213	205	229	355	322	470	742	1092	1092	1686	2563	2579	3885	5106	4288	4875	7153	6272	7581	7969	4486	6910	5628	3359	3063	4262	2507	2092	1710	1710	1786	1560	832
	280	228	223	204	248	316	296	251	265	229	252	273	273	221	184	191	244	339	340	328	334	392	565	822	822	1466	2304	2444	3456	4602	4285	5027	6725	5877	7467	7632	4506	6924	6102	3407	2773	3958	2474	2286	2228	2228	1984	1574	847
	290	192	189	218	251	245	222	191	204	212	265	298	298	340	300	277	252	265	253	351	340	406	574	870	870	1442	2508	2717	3677	4769	4437	5116	6746	6126	7246	7668	4962	7262	6594	3964	3384	4207	2731	2472	2249	2249	2273	1651	983
(5min)	300	171	202	220	236	268	240	213	189	211	207	229	229	284	325	348	342	322	285	272	281	366	502	840	840	1643	2664	2927	3931	4831	4722	5181	6479	6492	7818	7872	4986	7206	5679	3708	3036	3685	2594	2169	2139	2139	2178	1638	893
[truncated: 16 more columns]

## Sheet: 003_cortical_3_plotprofiles
		Dist. (nm)
	Time(s)	0	0.08	0.16	0.24	0.32	0.4	0.48	0.56	0.64	0.72	0.8	0.88	0.96	1.04	1.12	1.2	1.28	1.36	1.44	1.52	1.6	1.68	1.76	1.84	1.92	2	2.08	2.16	2.24	2.32	2.4	2.48	2.56	2.64	2.72	2.8	2.88	2.96	3.04	3.12	3.2	3.28	3.36	3.44	3.52	3.6	3.68	3.76
	0	246	246	280	311	485	473	460	357	382	382	441	459	415	429	395	369	287	314	358	399	292	275	337	295	307	247	243	252	308	390	368	309	299	242	287	235	249	239	239	232	258	240	288	238	253	209	209	217
	10	283	283	341	329	403	380	399	346	399	399	428	444	441	389	332	274	250	246	268	353	323	273	269	249	276	260	329	254	254	295	344	286	270	257	278	338	334	270	270	201	184	169	182	195	222	225	225	208
	20	405	405	489	474	582	617	669	726	974	974	1177	1498	1436	1633	1376	1319	1027	966	979	1359	1937	2507	3237	2518	3462	2944	3448	2573	3170	3510	4836	3337	4630	3976	5027	3646	3291	1906	1906	900	910	526	605	445	448	539	539	487
	30	420	420	557	573	647	707	648	702	844	844	1095	1407	1274	1427	1127	1331	1049	1194	1145	1429	1568	1756	2659	2216	3563	3111	3413	2307	2768	2921	4281	2718	4498	3554	4795	3235	3615	1981	1981	837	993	519	600	418	393	351	351	363
	40	479	479	772	682	705	634	696	682	876	876	996	1338	1416	1630	1201	1305	852	1120	966	1398	1580	1817	3118	2488	3782	3167	3412	2265	3099	2979	4427	2635	4061	3322	4568	3024	2897	1586	1586	920	1092	468	519	403	455	529	529	495
	50	464	464	795	770	791	645	602	662	947	947	1178	1519	1278	1298	1063	955	769	896	993	1496	1623	2030	3246	2490	3532	2767	3180	1871	2608	2953	4427	2776	4281	3340	4668	3217	3282	1766	1766	779	980	461	565	380	412	381	381	303
	60	483	483	715	629	718	729	698	732	736	736	1102	1470	1361	1329	1060	1183	858	1008	1114	1525	2168	2339	3295	2466	3288	2960	3238	2286	2908	3571	4967	3421	4961	3505	4480	3205	3091	1772	1772	819	1015	537	610	496	563	442	442	366
	70	404	404	740	648	656	578	650	696	833	833	1233	1483	1295	1251	1118	1230	1056	1234	1159	1587	2198	2528	3126	2478	3424	3408	3783	2959	3879	4642	5944	4257	5283	4036	4328	3272	3069	1902	1902	1098	1198	698	631	428	488	470	470	378
	80	381	381	472	425	595	623	734	785	991	991	1393	1498	1246	1182	909	905	876	1112	1247	1820	2318	3066	3631	3271	3774	3438	3370	3146	4296	5116	5300	4624	4637	3889	4463	3296	2964	1758	1758	1004	885	476	414	366	442	396	396	344
	90	420	420	470	435	507	511	819	820	1082	1082	1190	1258	1391	1443	1227	1013	978	1182	1551	1831	2489	3220	3631	3715	3501	2669	2427	2793	3541	5088	4785	4612	4565	3268	3334	2761	2606	1660	1660	776	736	467	509	512	441	436	436	366
	100	327	327	532	491	592	587	700	758	1048	1048	1043	1092	1161	1247	1119	941	910	975	1358	1788	2490	2558	2874	3176	3679	3191	3043	2931	3278	4431	4102	4216	4163	3910	3765	3569	2464	1338	1338	657	626	408	424	385	323	325	325	336
	110	306	306	512	482	574	561	663	635	831	831	1032	1266	1281	1210	961	842	780	935	1112	1481	2261	2603	2977	2665	3144	2722	2775	2475	2901	3844	3998	3892	4242	3273	3119	2818	2244	1308	1308	698	743	425	434	326	352	395	395	279
	120	302	302	482	549	641	568	643	717	973	973	1166	1293	1263	1105	1061	982	769	876	1070	1627	2149	2259	2860	2263	2792	2524	2771	2569	3055	3787	4546	3747	4412	3401	3406	2459	2218	1154	1154	525	537	369	476	373	381	336	336	262
	130	351	351	535	575	645	603	594	559	637	637	778	1044	1100	1367	1237	1127	940	1178	1251	1653	1941	2061	2593	2139	3081	2746	3150	2272	2833	3365	4150	3337	4018	3560	3728	2627	2626	1390	1390	535	537	353	432	457	455	354	354	236
	140	337	337	538	488	535	503	713	814	961	961	1185	1455	1437	1305	1160	1119	980	1088	1213	1730	2321	2194	3003	2206	2990	2653	2608	2015	2671	3907	4896	3951	4365	3612	4059	2989	2646	1239	1239	447	547	516	575	381	377	305	305	238
	150	429	429	624	567	674	651	677	731	984	984	1256	1327	1398	1413	1104	989	874	1036	1533	2140	2963	2850	3152	2701	3342	3062	2853	2583	3381	4631	4813	3931	4247	3925	4041	3722	2883	1314	1314	562	497	337	398	434	472	433	433	335
	160	360	360	533	469	605	630	863	768	906	906	1244	1369	1322	1234	1068	1015	960	982	1451	1787	2759	2578	2806	2709	3372	3219	2861	2417	2821	4482	4244	4094	4293	3854	3944	3608	2624	1309	1309	751	737	403	380	366	409	468	468	301
	170	320	320	490	360	408	471	769	760	813	813	1059	1209	1220	1106	1014	822	819	974	1539	1920	2453	2795	2783	3156	3131	2794	2498	2356	2780	3949	3548	4158	3487	3237	3228	2694	1937	1108	1108	551	371	304	276	333	325	387	387	359
	180	295	295	551	442	552	471	591	651	874	874	1034	1055	1239	1201	936	647	701	669	1196	1635	2682	2677	2515	2919	3001	3318	2528	2619	2378	3360	2572	3393	3078	3444	3168	2724	1512	792	792	561	513	401	340	320	310	412	412	303
	190	246	246	484	487	503	497	673	600	698	698	863	861	1008	905	852	511	604	504	888	1397	2223	2816	2429	2756	2794	2953	2477	2515	2121	3056	2505	3309	2665	2743	2394	2342	1572	1006	1006	457	383	367	334	269	234	269	269	241
	200	279	279	443	388	490	485	621	618	760	760	1017	1040	1111	943	915	621	674	611	958	1371	2273	2382	2526	2629	2659	2887	2491	2291	2252	2743	2586	2692	2587	2828	2485	2537	1526	1062	1062	637	496	340	277	326	293	287	287	191
	210	312	312	456	405	485	496	592	615	662	662	690	861	1184	1198	1269	908	890	819	1123	1451	1898	2308	2493	2374	2768	3092	3012	2726	2535	2529	2444	2672	3074	2950	2855	2758	2075	1282	1282	693	602	426	355	274	256	277	277	291
	220	360	360	564	481	498	472	591	632	828	828	1179	1162	1114	972	1061	984	933	792	715	1085	1676	2146	2357	2053	2604	2821	2908	2389	2449	2766	2990	3053	3264	3294	3118	2643	2152	1373	1373	699	584	383	290	280	267	322	322	235
	230	298	298	526	465	590	523	660	795	929	929	859	901	1045	1107	1127	917	969	813	794	916	1660	2364	2733	2203	2484	2617	2706	2347	2431	2684	2941	2943	3123	3132	3172	2971	2248	1251	1251	530	519	376	397	407	398	246	246	163
	240	293	293	425	377	446	478	721	723	720	720	991	1075	1318	1147	1301	1112	1023	879	910	1258	2107	2307	2380	2152	2459	2409	2405	2367	2657	3207	3214	3192	3230	3086	2949	2432	1951	1359	1359	740	586	445	417	351	259	190	190	168
	250	266	266	472	405	658	513	646	624	802	802	886	1015	1318	1343	1443	1141	1098	897	990	1133	1770	2370	2645	2599	2915	2567	2534	2331	2367	2609	2720	3136	3145	3115	2644	2289	1714	1129	1129	609	490	386	363	249	225	222	222	223
	260	195	195	391	355	443	380	629	604	669	669	816	721	1189	1087	1235	923	941	762	1137	1311	2104	2299	2003	2437	2465	2788	2441	2554	2239	2501	2017	2577	2436	2687	2147	1891	1229	990	990	649	477	385	300	241	230	237	237	200
	270	196	196	310	309	446	460	595	593	825	825	885	914	1119	1031	1169	869	921	714	966	1009	1605	2309	1890	2625	2380	2234	1830	2067	1891	2234	1904	2725	2197	2442	1817	1683	1153	809	809	413	253	229	210	259	263	243	243	298
	280	289	289	393	299	379	397	538	523	746	746	799	690	1030	872	945	620	815	634	826	796	1478	2088	1682	2397	2128	2553	2021	2117	1813	2422	1898	2923	2063	2179	1400	1620	1071	712	712	451	342	326	278	260	292	341	341	315
	290	298	298	376	248	358	385	679	626	643	643	580	606	989	1006	1000	638	761	572	681	755	1334	1929	1689	2464	2162	2484	1911	1932	1606	2241	1735	2679	2073	1885	1198	1329	813	673	673	525	382	334	276	288	295	377	377	277
(5min)	300	209	209	250	220	410	368	571	494	668	668	791	806	1071	952	948	689	865	639	746	765	1287	1673	1538	2051	1986	2020	1604	1726	1852	2657	2347	2983	2548	2022	1536	1437	1075	883	883	567	365	256	227	307	287	352	352	257
[truncated: 16 more columns]

## Sheet: 004_cortical_1_plotprofiles
		Dist. (nm)
	Time(s)	0	0.08	0.16	0.24	0.32	0.4	0.48	0.56	0.64	0.72	0.8	0.88	0.96	1.04	1.12	1.2	1.28	1.36	1.44	1.52	1.6	1.68	1.76	1.84	1.92	2	2.08	2.16	2.24	2.32	2.4	2.48	2.56	2.64	2.72	2.8	2.88	2.96	3.04	3.12	3.2	3.28	3.36	3.44	3.52	3.6	3.68	3.76
	0	200	197	229	264	297	298	268	277	280	284	297	270	264	261	261	251	236	204	211	209	193	217	235	267	229	205	191	194	192	226	286	295	239	210	192	199	204	191	202	224	241	227	183	177	198	217	211	194
	10	194	186	194	212	274	285	284	272	279	300	275	257	230	218	229	253	276	292	256	215	187	205	251	273	287	257	249	243	247	287	234	217	214	242	261	209	214	217	245	235	212	218	186	222	248	295	264	185
	20	255	303	384	491	621	660	642	623	672	731	818	924	1029	1318	1542	1903	2077	1837	1634	1826	2207	2647	3146	3519	3851	4045	3928	3928	4334	5091	5873	6134	5766	5640	4952	4562	3492	2653	2029	1585	1320	1184	1081	1071	976	847	846	702
	30	221	235	294	397	576	702	766	763	629	593	592	649	837	1180	1693	2188	2073	1703	1485	1671	2016	2350	2757	3277	3732	4182	4036	4030	4085	4489	5369	5975	6259	6050	5300	4680	3813	2903	2061	1527	1208	989	902	1025	1157	1036	771	539
	40	221	227	285	426	584	687	725	719	825	846	864	785	865	1184	1665	2034	2063	1913	1688	1750	1895	2192	2470	2742	3166	3795	4581	4839	5052	5337	5886	6249	5843	5140	4630	3968	3404	2605	1844	1388	1170	1034	931	836	841	877	791	687
	50	238	257	273	336	400	525	588	647	694	774	769	782	755	960	1345	1832	2164	2174	1964	1849	1705	1817	2102	2516	3219	3933	4681	4982	4920	4759	5171	5458	5599	5199	4698	3938	3136	2380	1621	1308	1142	1097	1010	932	762	838	725	627
	60	253	259	315	467	696	917	947	835	636	566	535	577	707	1060	1564	2087	2159	1959	1747	1688	1753	2006	2569	3130	3765	4342	4896	5175	5200	5494	5342	5265	4857	4562	4057	3416	2543	1647	1241	1107	1092	1129	1039	839	672	652	516	458
	70	184	193	286	440	594	730	799	817	703	586	547	651	900	1286	1687	2031	2196	2176	1999	1931	2170	2503	2825	3265	3817	4305	4514	4384	4424	4648	4832	4782	4438	3992	3779	3271	2414	1583	1164	1158	1300	1383	1009	790	543	450	360	356
	80	246	252	352	445	588	597	661	726	653	558	473	600	820	1186	1454	1609	1632	1473	1472	1662	2130	2711	3187	3812	4456	4749	4749	4587	4769	4754	4744	4912	4796	4367	3300	2227	1708	1323	1194	1252	1142	1052	878	769	669	520	490	487
	90	248	296	430	532	650	751	703	684	636	686	669	718	925	1250	1515	1585	1575	1714	1853	1749	1727	1759	2204	3069	3909	4578	4475	4052	3967	4009	4307	4403	4221	4163	3354	2474	1579	1136	1038	1182	1091	947	697	656	649	654	538	480
	100	234	272	321	388	460	599	767	795	754	640	599	641	732	944	1183	1558	1813	2006	2136	1897	1891	1809	1959	2477	3204	3708	3643	3580	3456	3811	4092	4223	4203	3753	3065	2263	1663	1221	1125	1263	1263	994	629	468	444	586	579	560
	110	224	244	261	364	451	497	581	645	633	564	476	420	556	802	1232	1557	1611	1511	1413	1580	1688	1753	1877	2246	2700	3269	3375	3439	3627	3957	4028	3886	3740	3529	3146	2497	1796	1294	1030	1115	1129	1086	808	638	537	525	428	383
	120	247	273	341	438	566	662	698	606	572	582	721	864	921	884	861	984	1150	1442	1483	1515	1624	1658	1843	2236	2858	3312	3418	3617	3569	3715	3877	4238	4423	4004	3427	2617	2121	1625	1274	1089	922	873	730	615	522	650	627	652
	130	258	259	267	314	360	465	578	658	647	579	549	698	853	1109	1077	1061	1028	1072	1175	1270	1552	1747	1876	1816	2112	2497	3244	3678	3569	3249	3236	3577	4065	3958	3577	2927	2335	1757	1398	1065	901	713	692	637	614	644	504	442
	140	250	241	245	296	379	498	561	643	773	778	684	617	726	915	1083	1229	1327	1516	1405	1235	1269	1451	1801	2133	2619	3001	3595	3663	3495	3091	3103	3621	3855	3954	3434	2992	2306	1630	1187	978	837	709	665	677	654	647	581	560
	150	203	251	277	296	344	453	589	629	541	503	478	536	594	724	833	953	1147	1164	1249	1407	1383	1590	1850	2120	2745	3221	3659	3688	3324	3265	3192	3435	3576	3646	3534	2868	2222	1613	1329	1146	1037	879	861	825	719	784	525	389
	160	302	284	299	281	323	423	513	565	629	636	686	809	912	1043	1084	1209	1340	1381	1315	1243	1448	1643	1829	2172	2575	2969	3290	3111	2741	2754	2872	3326	3465	3310	3145	2608	2119	1567	1246	1111	923	772	650	567	562	741	645	533
	170	301	307	331	362	435	488	546	646	596	644	618	691	827	976	1104	1143	1145	1098	1126	1254	1402	1418	1504	1730	2282	2664	3105	3006	2821	2738	2952	3329	3232	3262	2845	2308	1744	1306	1186	1075	1006	749	629	601	563	712	632	571
	180	257	360	438	474	494	557	657	746	722	646	592	566	664	824	975	1038	1130	1302	1366	1336	1315	1468	1765	2016	2392	2725	3063	3227	3000	2660	2715	2888	3312	3232	3197	2765	1883	1232	798	842	970	922	738	490	442	533	549	495
	190	210	245	310	388	472	509	549	601	547	637	662	679	642	648	776	1048	1214	1363	1332	1261	1407	1535	1666	1870	2323	2631	2965	2998	2754	2655	2615	2684	2498	2648	2628	2651	1898	1338	1026	993	962	834	693	608	541	555	495	429
	200	202	243	300	378	470	530	560	617	599	624	567	539	596	715	911	976	1094	1143	1248	1215	1325	1345	1443	1524	1966	2477	3028	3164	2838	2630	2638	2736	2772	2613	2506	2213	1823	1419	1053	910	801	762	613	530	426	363	434	493
	210	267	248	255	333	432	540	615	652	690	582	552	577	637	663	736	957	1136	1330	1283	1119	1145	1114	1198	1205	1500	2044	2669	3126	3119	2652	2474	2459	2621	2722	2953	3027	2710	2062	1617	1289	1093	827	645	628	670	683	612	474
	220	229	269	334	402	476	501	537	691	788	758	635	555	667	740	765	764	881	1037	1141	948	1110	1337	1379	1426	1440	1774	2339	2829	2705	2447	2275	2451	2701	2652	2591	2485	2494	2192	1822	1501	1095	816	614	543	581	611	626	584
	230	232	190	209	279	374	494	694	854	952	775	672	702	647	663	574	585	678	884	1204	1219	1316	1302	1306	1322	1545	1906	2389	2821	2816	2731	2658	2537	2767	3007	3136	2976	2442	1947	1548	1329	961	748	644	628	664	724	722	678
	240	257	234	222	279	393	495	602	618	650	639	585	612	672	696	655	727	911	1184	1326	1393	1285	1194	1279	1406	1731	2144	2539	3142	3043	2805	2493	2480	2991	3010	2805	2503	2302	2337	1919	1616	1164	933	684	566	490	556	571	497
	250	164	216	324	433	464	422	373	517	577	671	662	598	623	621	637	750	867	956	989	843	894	1022	1143	1304	1506	2065	2736	2993	2760	2239	2020	2099	2379	2655	2673	2384	2086	1881	1843	1659	1297	916	657	615	614	684	607	458
	260	245	367	430	442	401	383	432	540	696	816	809	789	724	800	857	865	821	937	1203	960	946	1005	1237	1544	1942	2282	2729	2718	2400	2039	1975	2184	2300	2521	2595	2367	2130	1788	1410	1364	1143	1090	937	837	750	717	585	479
	270	336	390	459	489	477	453	443	536	609	606	610	678	797	728	639	685	835	942	1018	963	1032	1198	1205	1345	1648	2057	2508	2503	2374	2044	2005	2159	2432	2349	2336	2304	2495	2295	1758	1416	1133	1020	716	568	514	482	455	391
	280	209	307	387	418	388	363	442	608	686	659	554	557	555	621	701	829	912	938	983	999	1090	1117	1141	1239	1435	1767	2031	2322	2308	2098	2096	2252	2549	2400	2319	2032	1762	1430	1304	1348	1314	1008	728	591	589	668	556	491
	290	249	314	395	435	459	392	496	654	814	787	553	486	428	481	540	661	826	959	1058	979	1101	1198	1201	1205	1300	1482	2033	2356	2306	2049	1932	2113	2314	2331	2119	2141	2038	1788	1631	1321	1213	1065	854	766	615	640	551	526
(5min)	300	271	310	347	350	355	319	294	386	511	653	626	542	495	460	517	600	795	965	998	885	937	1024	1018	1004	1079	1337	1781	2083	2313	2044	1972	1965	2063	2204	2247	2487	2399	2156	1741	1530	1309	1236	975	717	561	608	544	503
[truncated: 16 more columns]

[truncated: 32 more sheets: 004_cortical_2_plotprofiles, 004_cortical_3_plotprofiles, 006_cortical_1_plotprofiles, 006_cortical_2_plotprofiles, 006_cortical_3_plotprofiles, 007_cortical_1_plotprofiles, 007_cortical_2_plotprofiles, 007_cortical_3_plotprofiles, 008_cortical_1_plotprofiles, 008_cortical_2_plotprofiles, 008_cortical_3_plotprofiles, 008_cortical_4_plotprofiles, 010_cortical_1_plotprofiles, 010_cortical_2_plotprofiles, 011_cortical_1_plotprofiles, 011_cortical_2_plotprofiles, 012_cortical_1_plotprofiles, 012_cortical_2_plotprofiles, 013_cortical_1_plotprofiles, 014_cortical_1_plotprofiles …]
