# Supplementary material for: Generation of stress fibers through myosin-driven reorganization of the actin cortex
Source: eLife. 2021 Jan 28;10:e60710. doi: 10.7554/eLife.60710 (PMC7877910; doi:10.7554/eLife.60710)
Supplement: Figure 3—source data 1. [file elife-60710-fig3-data1.xlsx]

## Sheet: Sheet1
Time lapse videos length = 1h total							Number of de novo forming fibers
								Number		%
040620_U2OS_LifeGFP_H2BCherry_iRFPpax_visit1								Under	Outside	Under	Outside
Under	Outside						1	5	0	100	0
5	0						2	5	5	50	50
040620_U2OS_LifeGFP_H2BCherry_iRFPpax_001_visit_3							3	6	2	75	25
Under	Outside						4	3	1	75	25
5	5						5	3	0	100	0
040620_U2OS_LifeGFP_H2BCherry_iRFPpax_001_visit_6							6	3	0	100	0
Under	Outside						7	3	1	75	25
6	2						8	7	2	77.7778	22.2222
040620_U2OS_LifeGFP_H2BCherry_iRFPpax_001_visit_7							9	1	6	14.2857	85.7143
Under	Outside						10	5	1	83.3333	16.6667
0	0						11	2	1	66.6667	33.3333
040620_U2OS_LifeGFP_H2BCherry_iRFPpax_001_visit_9							12	2	0	100	0
Under	Outside						13	1	0	100	0
3	1						14	6	3	66.6667	33.3333
040620_U2OS_LifeGFP_H2BCherry_iRFPpax_002_visit_1							15	6	1	85.7143	14.2857
Under	Outside						16	3	0	100	0
3	0						17	4	2	66.6667	33.3333
040620_U2OS_LifeGFP_H2BCherry_iRFPpax_002_visit_2							18	6	0	100	0
Under	Outside						19	5	0	100	0
3	0								Average	80.848	19.152
040620_U2OS_LifeGFP_H2BCherry_iRFPpax_002_visit_3									SEM	5.14746	5.14746
Under	Outside								ST.Dev	21.8388	21.8388
3	1
040620_U2OS_LifeGFP_H2BCherry_iRFPpax_002_visit_6
Under	Outside							Average	SEM
7	2						Under	80.848	5.14746
040620_U2OS_LifeGFP_H2BCherry_iRFPpax_002_visit_7							Outside	19.152	5.14746
Under	Outside
1	6
040620_U2OS_LifeGFP_H2BCherry_iRFPpax_003_visit_1
Under	Outside
0	0
040620_U2OS_LifeGFP_H2BCherry_iRFPpax_003_visit_1
Under	Outside
5	1
040620_U2OS_LifeGFP_H2BCherry_iRFPpax_003_visit_4
Under	Outside
2	1
040620_U2OS_LifeGFP_H2BCherry_iRFPpax_003_visit_6
Under	Outside
2	0
------------------------------------------------------------------------------------
15119_1522_GFPlife_H2BCherry_iRFPpax_20sinterval_001_visit_2
Under	Outside
1	0
15119_1522_GFPlife_H2BCherry_iRFPpax_20sinterval_001_visit_3
Under	Outside
6	3
15119_1522_GFPlife_H2BCherry_iRFPpax_20sinterval_001_visit_4
Under	Outside
6	1
15119_1522_GFPlife_H2BCherry_iRFPpax_20sinterval_001_visit_5
Under	Outside
3	0
15119_1522_GFPlife_H2BCherry_iRFPpax_20sinterval_001_visit_6
Under	Outside
4	2
211020_1522__U2OS_lifeGFP_H2BmCherry_paxiRFP_001_visit_1
Under	Outside
6	0
211020_1522__U2OS_lifeGFP_H2BmCherry_paxiRFP_001_visit_3
Under	Outside
5	0
