# Supplementary material for: Generation of stress fibers through myosin-driven reorganization of the actin cortex
Source: eLife. 2021 Jan 28;10:e60710. doi: 10.7554/eLife.60710 (PMC7877910; doi:10.7554/eLife.60710)
Supplement: Figure 3—source data 2. [file elife-60710-fig3-data2.xlsx]

## Sheet: Nucleus
15119_001_visit3		label	bbox-0	bbox-1	bbox-2	bbox-3	bbox-4	bbox-5	duration
		3	0	641	433	91	753	551	91
		7	2	617	489	9	657	544	7
		8	6	677	413	10	705	447	4
		28	60	581	482	65	633	517	5
		34	76	689	433	80	717	468	4
		36	78	593	523	82	621	558	4
		37	80	569	482	84	645	523	4
		38	84	557	468	91	621	510	7
15119_001_visit4		label	bbox-0	bbox-1	bbox-2	bbox-3	bbox-4	bbox-5	duration
		1	0	259	223	14	335	334	14
		4	0	391	375	13	503	451	13
		5	0	403	251	4	467	320	4
		16	5	379	251	11	467	313	6
		21	9	427	535	16	479	569	7
		31	14	415	368	27	503	500	13
		33	15	319	230	23	419	299	8
		55	23	391	251	28	431	327	5
		56	23	379	354	31	503	479	8
		59	27	271	264	35	323	327	8
		61	27	379	431	31	467	479	4
		69	31	259	223	87	515	569	56
		78	40	307	278	44	383	341	4
		111	82	355	237	86	419	361	4
15119_001_visit8		label	bbox-0	bbox-1	bbox-2	bbox-3	bbox-4	bbox-5	duration
		1	0	416	374	12	480	457	12
		2	0	476	360	7	588	505	7
		3	0	452	394	28	612	699	28
		8	2	428	581	7	516	651	5
		13	10	512	360	15	588	422	5
		22	16	404	367	91	612	699	75
		42	43	452	374	48	552	457	5
		44	44	488	450	48	552	498	4
		71	70	476	381	75	516	415	5
		74	72	428	401	76	480	484	4
		76	76	488	408	81	564	491	5
		88	86	440	588	91	492	637	5
001_visit2		label	bbox-0	bbox-1	bbox-2	bbox-3	bbox-4	bbox-5	duration
		4	2	240	594	91	580	787	89
		8	4	372	642	11	460	684	7
		32	55	264	656	60	304	690	5
001_visit4		label	bbox-0	bbox-1	bbox-2	bbox-3	bbox-4	bbox-5	duration
		1	0	370	428	32	578	622	32
		4	23	370	428	55	578	622	32
		13	59	406	518	64	494	622	5
		19	68	370	463	77	578	622	9
		21	72	502	470	77	542	511	5
		26	83	382	470	91	566	622	8
001_visit10		label	bbox-0	bbox-1	bbox-2	bbox-3	bbox-4	bbox-5	duration
		4	9	618	245	14	658	293	5
		7	14	690	231	19	730	273	5
		9	17	642	273	21	682	307	4
		15	25	630	300	30	694	356	5
		23	38	426	189	91	730	557	53
		30	48	474	321	57	526	356	9
		35	50	546	280	54	574	314	4
		36	52	498	418	57	562	446	5
		61	81	462	328	88	526	370	7
002_visit1		label	bbox-0	bbox-1	bbox-2	bbox-3	bbox-4	bbox-5	duration
		1	0	420	261	14	448	289	14
		2	1	324	296	91	568	621	90
		9	4	444	358	10	496	393	6
		13	8	348	462	18	400	538	10
		16	9	456	351	17	520	399	8
		25	13	504	406	24	568	462	11
		36	25	504	351	29	532	386	4
		44	37	456	309	46	556	441	9
		50	45	504	399	54	556	462	9
		58	54	492	309	62	568	434	8
		76	73	540	399	77	568	462	4
		86	82	552	496	88	580	573	6
		94	86	564	455	90	580	524	4
002_visit2		label	bbox-0	bbox-1	bbox-2	bbox-3	bbox-4	bbox-5	duration
		1	0	346	375	69	590	665	69
		7	11	478	562	16	518	610	5
		9	12	478	409	22	590	548	10
		24	73	346	472	90	590	665	17
		27	83	514	520	87	590	596	4
		30	85	442	478	89	494	520	4
		33	87	430	575	91	458	624	4
		35	87	442	513	91	542	555	4
003_visit1		label	bbox-0	bbox-1	bbox-2	bbox-3	bbox-4	bbox-5	duration
		1	0	284	495	33	396	696	33
		2	0	344	440	4	396	488	4
		4	0	368	530	91	480	682	91
		8	0	452	419	15	552	516	15
		13	4	428	343	12	504	447	8
		14	5	440	599	9	480	627	4
		41	22	464	405	28	552	468	6
		47	27	344	620	34	396	703	7
		51	32	296	613	39	336	648	7
		55	37	368	620	42	396	655	5
		63	43	308	551	48	384	585	5
		66	53	308	551	61	372	613	8
		74	62	308	558	91	384	592	29
		76	68	344	648	78	384	703	10
		79	73	368	447	77	408	475	4
		84	79	392	516	91	468	585	12
		85	81	452	447	87	528	551	6
		91	87	428	481	91	492	516	4
003_visit2		label	bbox-0	bbox-1	bbox-2	bbox-3	bbox-4	bbox-5	duration
		1	0	506	252	91	762	459	91
		2	38	746	307	45	762	335	7
		5	62	566	293	67	618	342	5
003_visit3		label	bbox-0	bbox-1	bbox-2	bbox-3	bbox-4	bbox-5	duration
		21	28	539	553	35	651	677	7
		43	59	635	573	64	663	615	5
		47	65	623	629	69	675	684	4
		50	66	575	497	79	663	629	13
		55	71	599	643	75	675	726	4
		59	73	539	504	78	591	553	5
		61	76	503	670	81	543	719	5
		68	80	503	677	84	591	719	4
		72	82	599	504	91	663	601	9
003_visit4		label	bbox-0	bbox-1	bbox-2	bbox-3	bbox-4	bbox-5	duration
		1	0	458	594	5	510	622	5
		2	0	434	393	63	690	643	63
		20	32	578	414	36	606	435	4
		36	65	518	449	70	582	497	5
		43	73	434	393	91	690	643	18
003_visit5		label	bbox-0	bbox-1	bbox-2	bbox-3	bbox-4	bbox-5	duration
		2	0	566	509	91	798	682	91
		4	0	698	571	16	810	661	16
		5	0	770	474	14	810	571	14
		6	2	542	495	10	582	523	8
		15	12	710	578	18	750	620	6
		24	19	722	433	37	810	537	18
		25	19	770	516	25	810	551	6
		29	22	698	544	36	750	634	14
		40	38	734	440	91	810	571	53
		44	40	686	523	59	774	661	19
		52	60	698	599	64	726	661	4
		64	87	674	557	91	726	641	4
003_visit6		label	bbox-0	bbox-1	bbox-2	bbox-3	bbox-4	bbox-5	duration
		9	14	483	506	23	679	617	9
		16	21	411	548	26	523	624	5
		27	33	507	548	37	547	617	4
		43	48	507	520	54	583	596	6
		45	49	579	541	54	631	589	5
		46	49	591	638	53	631	665	4
		64	70	579	554	76	655	645	6
		72	78	423	520	91	547	645	13
		78	83	579	541	91	667	638	8
004_visit1		label	bbox-0	bbox-1	bbox-2	bbox-3	bbox-4	bbox-5	duration
		1	0	437	513	11	585	686	11
		3	1	377	541	6	417	610	5
		10	5	569	617	14	621	686	9
		12	8	557	547	12	621	617	4
		17	10	449	506	29	525	637	19
		22	17	413	554	32	501	693	15
		28	19	521	610	23	561	658	4
		29	19	557	603	25	609	714	6
		31	20	509	534	26	561	610	6
		43	32	401	631	38	513	721	6
		67	54	497	582	62	549	637	8
		72	63	581	603	68	621	693	5
		75	65	365	450	91	621	728	26
004_visit2		label	bbox-0	bbox-1	bbox-2	bbox-3	bbox-4	bbox-5	duration
		1	0	422	428	58	606	718	58
		2	5	446	428	14	486	469	9
		35	61	422	531	73	450	663	12
		37	62	446	656	67	474	691	5
		38	62	482	677	75	546	718	13
		43	76	422	580	91	582	718	15
004_visit3		label	bbox-0	bbox-1	bbox-2	bbox-3	bbox-4	bbox-5	duration
		1	0	472	320	51	812	660	51
		8	17	652	604	21	704	646	4
		11	21	568	396	25	596	445	4
		12	21	568	459	27	632	514	6
		14	23	544	611	27	608	646	4
		16	23	772	431	27	800	466	4
		26	33	484	390	38	536	417	5
		32	39	484	396	47	524	424	8
		40	43	724	528	47	812	577	4
		50	61	796	473	65	812	500	4
004_visit4		label	bbox-0	bbox-1	bbox-2	bbox-3	bbox-4	bbox-5	duration
		1	0	263	310	91	531	524	91
		14	63	479	476	68	555	524	5
		15	65	575	448	71	603	490	6
004_visit6		label	bbox-0	bbox-1	bbox-2	bbox-3	bbox-4	bbox-5	duration
		3	0	545	669	7	633	759	7
		13	11	461	641	91	657	808	80
		14	13	401	759	22	465	849	9
		19	26	401	731	32	537	884	6
		26	37	413	704	54	477	835	17
		27	38	461	773	43	501	814	5
		32	43	509	759	48	561	821	5
		35	45	533	752	49	561	773	4
		47	56	437	787	60	489	814	4
		52	64	413	745	76	477	849	12
		57	70	413	724	91	573	863	21

## Sheet: Cytoplasm
15119_001_visit3		label	bbox-0	bbox-1	bbox-2	bbox-3	bbox-4	bbox-5	duration
		2	0	544	674	6	596	729	6
		3	0	508	501	91	836	736	91
		4	1	508	335	51	632	397	50
		5	3	364	494	17	440	653	14
		7	3	508	688	7	548	723	4
		18	22	364	515	30	416	653	8
		37	52	508	355	91	560	397	39
		39	53	592	681	60	692	736	7
		47	65	532	577	84	800	736	19
		51	83	712	577	87	788	632	4
15119_001_visit4		label	bbox-0	bbox-1	bbox-2	bbox-3	bbox-4	bbox-5	duration
		1	0	183	181	24	403	292	24
		3	0	555	486	9	691	611	9
		5	0	543	410	19	679	528	19
		6	0	627	597	10	715	694	10
		23	7	447	354	90	715	701	83
		33	13	219	181	17	295	244	4
		51	19	519	354	25	583	424	6
		52	20	183	181	33	295	264	13
		54	20	423	244	25	451	264	5
		61	24	291	195	47	403	237	23
		78	33	147	230	39	175	264	6
		82	34	495	493	38	559	535	4
		92	40	147	181	91	403	514	51
		114	49	531	368	53	583	438	4
		136	64	423	244	71	451	264	7
		140	71	567	486	75	631	555	4
15119_001_visit8		label	bbox-0	bbox-1	bbox-2	bbox-3	bbox-4	bbox-5	duration
		1	0	165	467	5	193	502	5
		3	0	225	619	91	637	820	91
		4	0	297	481	4	325	515	4
		5	0	261	197	91	757	682	91
		22	13	153	439	91	433	786	78
		25	13	609	197	18	673	245	5
		28	14	189	439	30	241	481	16
		41	17	261	529	23	397	626	6
		43	18	369	716	35	409	806	17
		56	24	309	578	29	397	682	5
		65	32	201	439	43	241	481	11
		74	35	321	626	40	361	682	5
		77	36	165	578	45	229	619	9
		86	38	309	585	45	361	619	7
		102	44	357	481	48	397	515	4
		109	47	321	571	51	421	682	4
		118	53	297	543	65	373	647	12
		125	56	369	599	60	421	647	4
		138	64	165	585	70	229	640	6
		146	67	321	585	74	361	640	7
		175	78	585	737	84	637	799	6
		182	81	549	245	91	757	405	10
		194	87	645	197	91	733	308	4
001_visit2		label	bbox-0	bbox-1	bbox-2	bbox-3	bbox-4	bbox-5	duration
		1	0	135	330	91	763	871	91
		5	27	531	732	36	619	781	9
		10	39	543	732	47	595	767	8
		13	52	291	774	58	319	815	6
001_visit4		label	bbox-0	bbox-1	bbox-2	bbox-3	bbox-4	bbox-5	duration
		1	0	82	264	91	674	859	91
		5	26	574	811	34	590	839	8
		6	27	262	555	32	350	603	5
		14	36	574	783	41	602	852	5
		22	42	574	762	48	626	846	6
		26	49	562	638	53	590	665	4
		28	49	598	458	62	674	541	13
		31	52	610	534	56	638	568	4
		38	60	526	631	64	578	679	4
		39	60	574	811	65	602	846	5
		40	61	466	596	67	554	672	6
		42	69	538	527	74	638	645	5
		46	75	178	562	79	218	610	4
		51	77	514	596	91	614	714	14
		54	78	598	485	83	674	582	5
001_visit10		label	bbox-0	bbox-1	bbox-2	bbox-3	bbox-4	bbox-5	duration
		2	0	297	238	91	445	487	91
		5	0	429	418	91	745	847	91
		6	0	465	245	5	541	314	5
		11	0	645	85	11	769	224	11
		12	0	645	480	4	685	522	4
		16	0	717	78	4	745	99	4
		44	8	645	446	16	745	522	8
		45	8	681	508	13	745	563	5
		49	9	645	51	24	865	245	15
		66	14	321	293	21	421	397	7
		97	19	633	141	31	733	203	12
		113	22	465	286	26	481	314	4
		119	23	633	466	29	733	529	6
		122	24	429	598	32	493	646	8
		138	29	321	307	35	421	397	6
		148	30	393	65	91	805	376	61
		159	33	705	515	38	745	570	5
		169	36	441	605	42	481	660	6
		187	41	429	259	45	529	349	4
		199	45	417	272	50	469	369	5
		207	48	489	556	52	541	619	4
		212	51	429	626	58	481	674	7
		215	52	465	702	56	517	737	4
		227	57	465	702	61	505	730	4
		247	66	501	667	70	553	702	4
		265	73	537	626	77	601	667	4
		274	77	573	584	81	649	674	4
		278	79	537	598	83	589	640	4
002_visit1		label	bbox-0	bbox-1	bbox-2	bbox-3	bbox-4	bbox-5	duration
		1	0	247	71	91	683	708	91
		2	0	367	563	34	527	785	34
		5	0	535	217	8	659	390	8
		6	1	259	85	6	287	182	5
		7	1	475	792	40	647	958	39
		15	6	523	279	12	575	341	6
		36	15	595	625	19	683	715	4
		39	17	247	161	34	287	251	17
		53	24	583	598	28	623	653	4
		58	28	367	563	35	419	660	7
		60	28	619	708	50	659	771	22
		63	29	595	473	48	683	715	19
		83	37	451	771	91	647	965	54
		88	39	631	397	44	683	459	5
		101	42	511	854	50	635	951	8
		119	50	547	286	63	587	334	13
		122	52	535	487	70	683	715	18
		124	54	439	743	64	491	792	10
		133	58	307	404	62	323	445	4
		150	69	547	473	91	683	715	22
		152	70	571	778	79	611	826	9
		154	71	271	286	76	323	341	5
		190	84	535	854	91	635	965	7
002_visit2		label	bbox-0	bbox-1	bbox-2	bbox-3	bbox-4	bbox-5	duration
		1	0	301	110	91	905	747	91
		6	2	505	144	9	677	214	7
		15	9	529	380	23	557	401	14
		16	9	685	117	21	821	214	12
		20	13	313	394	17	353	470	4
		24	16	589	484	23	617	525	7
		51	63	517	144	74	665	207	11
		54	67	457	200	73	509	255	6
		57	84	481	200	91	605	255	7
		58	87	349	269	91	473	422	4
003_visit1		label	bbox-0	bbox-1	bbox-2	bbox-3	bbox-4	bbox-5	duration
		1	0	159	727	27	379	914	27
		4	0	387	727	11	403	782	11
		11	0	555	311	91	715	644	91
		13	0	639	263	4	655	291	4
		14	0	627	297	5	703	374	5
		20	3	279	685	13	307	734	10
		23	4	591	408	8	619	464	4
		32	9	543	304	13	631	436	4
		44	14	639	311	18	691	374	4
		50	19	171	720	34	379	886	15
		52	19	639	311	24	691	360	5
		58	22	663	374	26	703	429	4
		60	25	351	741	34	415	831	9
		66	28	603	249	35	655	304	7
		78	35	375	748	43	439	803	8
		82	36	555	242	73	691	381	37
		85	37	255	824	45	307	859	8
		89	39	159	789	46	199	907	7
		92	41	267	727	46	295	748	5
		100	43	627	318	47	679	367	4
		104	46	279	706	67	499	879	21
		109	47	267	713	51	319	775	4
		111	48	219	914	53	247	935	5
		112	48	567	221	53	607	256	5
		113	48	663	367	54	703	429	6
		148	68	255	720	91	427	879	23
		151	70	327	713	78	403	782	8
		166	77	567	595	82	595	637	5
		168	77	663	388	83	715	422	6
		181	83	447	692	87	535	775	4
003_visit2		label	bbox-0	bbox-1	bbox-2	bbox-3	bbox-4	bbox-5	duration
		1	0	167	378	40	627	697	40
		3	0	275	593	4	327	641	4
		4	0	671	198	91	879	406	91
		15	20	167	510	31	219	607	11
		22	32	431	413	37	531	482	5
		27	38	419	441	48	531	503	10
		30	41	215	461	50	303	517	9
		37	48	743	247	53	783	281	5
		41	51	491	489	55	531	524	4
		48	59	383	468	91	579	558	32
		54	84	587	454	91	627	482	7
003_visit3		label	bbox-0	bbox-1	bbox-2	bbox-3	bbox-4	bbox-5	duration
		7	0	457	324	5	533	379	5
		9	0	553	352	91	737	816	91
		38	5	649	587	15	737	823	10
		51	8	445	262	15	521	345	7
		52	8	457	324	15	521	379	7
		75	14	673	649	18	725	705	4
		80	16	673	712	21	713	767	5
		98	20	649	698	31	713	816	11
		126	31	397	275	44	497	331	13
		135	33	565	774	37	641	816	4
		149	37	469	331	45	533	372	8
		164	48	481	331	52	533	372	4
		175	50	265	234	91	557	469	41
		176	50	661	663	62	713	795	12
		196	58	589	809	62	617	843	4
		218	71	517	774	81	641	906	10
		224	77	385	539	82	461	622	5
		246	85	373	365	91	437	435	6
003_visit4		label	bbox-0	bbox-1	bbox-2	bbox-3	bbox-4	bbox-5	duration
		1	0	72	364	91	592	911	91
		3	0	276	426	12	364	482	12
		11	0	624	385	17	712	447	17
		20	4	252	392	12	328	440	8
		21	4	276	516	8	316	544	4
		24	4	384	496	8	436	579	4
		29	5	396	371	14	472	468	9
		43	9	408	586	14	448	627	5
		48	10	396	627	23	472	696	13
		50	11	348	378	18	388	419	7
		87	18	624	385	32	688	440	14
		95	20	360	378	24	388	405	4
		96	20	396	385	91	760	752	71
		103	27	516	634	34	568	669	7
		116	37	624	385	42	688	419	5
		142	50	408	586	54	436	620	4
		149	55	240	738	60	292	780	5
		158	60	264	454	68	400	586	8
		170	64	252	392	69	316	475	5
		186	69	324	800	80	400	842	11
		192	71	216	696	81	316	780	10
		206	80	324	786	87	376	842	7
003_visit5		label	bbox-0	bbox-1	bbox-2	bbox-3	bbox-4	bbox-5	duration
		1	0	119	177	52	303	294	52
		3	0	527	523	54	591	634	54
		4	0	587	578	91	795	855	91
		5	0	719	336	91	843	544	91
		9	25	119	183	30	195	232	5
		16	49	119	183	91	219	267	42
003_visit6		label	bbox-0	bbox-1	bbox-2	bbox-3	bbox-4	bbox-5	duration
		2	0	269	478	74	789	893	74
		10	6	713	776	10	765	838	4
		30	31	497	838	35	525	866	4
		42	49	641	859	54	669	886	5
		43	49	701	789	55	729	817	6
		58	67	497	859	71	525	886	4
		62	73	641	824	82	681	852	9
		63	75	269	637	91	405	852	16
		66	78	677	623	90	765	838	12
004_visit1		label	bbox-0	bbox-1	bbox-2	bbox-3	bbox-4	bbox-5	duration
		1	0	152	330	38	660	843	38
		2	0	224	600	9	396	822	9
		7	3	548	476	8	612	531	5
		9	7	596	517	14	648	600	7
		26	23	284	718	91	408	829	68
		28	24	176	330	28	252	372	4
		30	24	428	801	29	456	829	5
		35	30	356	690	59	612	843	29
		40	33	236	593	43	312	670	10
		43	38	164	337	49	288	587	11
		47	44	260	593	54	336	711	10
		54	50	152	337	63	300	538	13
		60	58	452	815	62	480	843	4
		65	63	164	434	69	288	559	6
		66	63	392	649	91	660	843	28
		67	64	596	531	70	648	635	6
		74	70	152	330	81	276	503	11
		80	79	584	503	83	624	552	4
		83	81	164	337	87	276	427	6
		85	82	272	670	87	336	760	5
004_visit2		label	bbox-0	bbox-1	bbox-2	bbox-3	bbox-4	bbox-5	duration
		1	0	200	183	91	576	661	91
		4	0	476	446	82	660	765	82
		38	47	608	516	53	660	619	6
		39	48	512	405	53	552	467	5
		49	56	596	509	60	648	626	4
		76	78	596	654	83	660	737	5
		78	81	380	578	85	420	661	4
		81	83	380	419	89	432	488	6
004_visit3		label	bbox-0	bbox-1	bbox-2	bbox-3	bbox-4	bbox-5	duration
		1	0	238	265	73	902	695	73
		2	10	586	300	14	638	328	4
		7	12	754	348	26	794	390	14
		22	25	262	515	29	326	556	4
		35	34	766	348	50	806	411	16
		41	51	778	355	91	842	487	40
004_visit4		label	bbox-0	bbox-1	bbox-2	bbox-3	bbox-4	bbox-5	duration
		1	0	145	386	91	689	621	91
		4	0	793	392	17	857	427	17
		10	6	529	538	10	569	579	4
		25	17	637	531	30	821	607	13
		29	22	277	268	39	353	323	17
		37	33	793	489	43	929	593	10
		39	41	685	545	55	821	607	14
		40	51	805	399	63	929	489	12
		46	59	277	302	68	305	323	9
		54	68	697	531	78	785	607	10
		59	72	745	392	91	965	593	19
		60	74	481	524	78	509	545	4
		62	78	661	579	91	749	607	13
004_visit4		label	bbox-0	bbox-1	bbox-2	bbox-3	bbox-4	bbox-5	duration
		1	0	249	825	44	373	977	44
		2	0	501	347	91	757	721	91
		19	27	669	693	31	721	762	4
		23	29	693	569	36	745	638	7
		25	33	417	638	65	493	721	32
		26	34	381	749	38	409	783	4
		30	39	381	735	43	409	783	4
		33	43	417	693	47	445	721	4
		39	51	381	756	75	397	783	24
		50	66	405	707	71	433	742	5
		53	72	465	610	79	517	645	7
		59	79	405	686	87	457	742	8

## Sheet: Nucleus to cytoplasm ratio
	Area	Ratio nucl. vs cytop.
001_visit3_cyto	615.469	0.395312
001_visit3_nucleus	243.302
001_visit4_cyto	549.395	0.684505
001_visit4_nucleus	376.064
001_visit8_cyto	1113.12	0.33538
001_visit8_nucleus	373.318
001_visit2_cyto	953.626	0.298153
001_visit2_nucleus	284.326
001_visit4_cyto	984.205	0.179293
001_visit4_nucleus	176.461
001_visit10_cyto	1124.7	0.38265
001_visit10_nucleus	430.368
002_visit1_cyto	1214.84	0.382075
002_visit1_nucleus	464.16
002_visit2_cyto	872.269	0.396714
002_visit2_nucleus	346.042
003_visit1_cyto	910.445	0.442537
003_visit1_nucleus	402.906
003_visit2_cyto	619.155	0.368068
003_visit2_nucleus	227.891
003_visit3_cyto	1196.94	0.225941
003_visit3_nucleus	270.438
003_visit4_cyto	1247.21	0.230716
003_visit4_nucleus	287.75
003_visit5_cyto	715.27	0.441818
003_visit5_nucleus	316.019
003_visit6_cyto	766.317	0.363989
003_visit6_nucleus	278.931
004_visit1_cyto	824.986	0.407683
004_visit1_nucleus	336.333
004_visit2_cyto	664.659	0.378092
004_visit2_nucleus	251.302
004_visit3_cyto	746.944	0.730169
004_visit3_nucleus	545.395
004_visit4_cyto	867.955	0.435989
004_visit4_nucleus	378.419
004_visit6_cyto	771.078	0.408089
004_visit6_nucleus	314.669

## Sheet: Trimmed_Nucleus
15119_001_visit3		label (pulse)	duration	duration(min)	Freq(count)
		3	91	30.3333	8
		7	7	2.33333
		8	4	1.33333
		28	5	1.66667
		34	4	1.33333
		36	4	1.33333
		37	4	1.33333
		38	7	2.33333
15119_001_visit4		label (pulse)	duration	duration(min)	Freq(count)
		1	14	4.66667	14
		4	13	4.33333
		5	4	1.33333
		16	6	2
		21	7	2.33333
		31	13	4.33333
		33	8	2.66667
		55	5	1.66667
		56	8	2.66667
		59	8	2.66667
		61	4	1.33333
		69	56	18.6667
		78	4	1.33333
		111	4	1.33333
15119_001_visit8		label (pulse)	duration	duration(min)	Freq(count)
		1	12	4	12
		2	7	2.33333
		3	28	9.33333
		8	5	1.66667
		13	5	1.66667
		22	75	25
		42	5	1.66667
		44	4	1.33333
		71	5	1.66667
		74	4	1.33333
		76	5	1.66667
		88	5	1.66667
001_visit2		label (pulse)	duration	duration(min)	Freq(count)
		4	89	29.6667	3
		8	7	2.33333
		32	5	1.66667
001_visit4		label (pulse)	duration	duration(min)	Freq(count)
		1	32	10.6667	6
		4	32	10.6667
		13	5	1.66667
		19	9	3
		21	5	1.66667
		26	8	2.66667
001_visit10		label (pulse)	duration	duration(min)	Freq(count)
		4	5	1.66667	9
		7	5	1.66667
		9	4	1.33333
		15	5	1.66667
		23	53	17.6667
		30	9	3
		35	4	1.33333
		36	5	1.66667
		61	7	2.33333
002_visit1		label (pulse)	duration	duration(min)	Freq(count)
		1	14	4.66667	13
		2	90	30
		9	6	2
		13	10	3.33333
		16	8	2.66667
		25	11	3.66667
		36	4	1.33333
		44	9	3
		50	9	3
		58	8	2.66667
		76	4	1.33333
		86	6	2
		94	4	1.33333
002_visit2		label (pulse)	duration	duration(min)	Freq(count)
		1	69	23	8
		7	5	1.66667
		9	10	3.33333
		24	17	5.66667
		27	4	1.33333
		30	4	1.33333
		33	4	1.33333
		35	4	1.33333
003_visit1		label (pulse)	duration	duration(min)	Freq(count)
		1	33	11	18
		2	4	1.33333
		4	91	30.3333
		8	15	5
		13	8	2.66667
		14	4	1.33333
		41	6	2
		47	7	2.33333
		51	7	2.33333
		55	5	1.66667
		63	5	1.66667
		66	8	2.66667
		74	29	9.66667
		76	10	3.33333
		79	4	1.33333
		84	12	4
		85	6	2
		91	4	1.33333
003_visit2		label (pulse)	duration	duration(min)	Freq(count)
		1	91	30.3333	3
		2	7	2.33333
		5	5	1.66667
003_visit3		label (pulse)	duration	duration(min)	Freq(count)
		21	7	2.33333	9
		43	5	1.66667
		47	4	1.33333
		50	13	4.33333
		55	4	1.33333
		59	5	1.66667
		61	5	1.66667
		68	4	1.33333
		72	9	3
003_visit4		label (pulse)	duration	duration(min)	Freq(count)
		1	5	1.66667	5
		2	63	21
		20	4	1.33333
		36	5	1.66667
		43	18	6
003_visit5		label (pulse)	duration	duration(min)	Freq(count)
		2	91	30.3333	12
		4	16	5.33333
		5	14	4.66667
		6	8	2.66667
		15	6	2
		24	18	6
		25	6	2
		29	14	4.66667
		40	53	17.6667
		44	19	6.33333
		52	4	1.33333
		64	4	1.33333
003_visit6		label (pulse)	duration	duration(min)	Freq(count)
		9	9	3	9
		16	5	1.66667
		27	4	1.33333
		43	6	2
		45	5	1.66667
		46	4	1.33333
		64	6	2
		72	13	4.33333
		78	8	2.66667
004_visit1		label (pulse)	duration	duration(min)	Freq(count)
		1	11	3.66667	13
		3	5	1.66667
		10	9	3
		12	4	1.33333
		17	19	6.33333
		22	15	5
		28	4	1.33333
		29	6	2
		31	6	2
		43	6	2
		67	8	2.66667
		72	5	1.66667
		75	26	8.66667
004_visit2		label (pulse)	duration	duration(min)	Freq(count)
		1	58	19.3333	6
		2	9	3
		35	12	4
		37	5	1.66667
		38	13	4.33333
		43	15	5
004_visit3		label (pulse)	duration	duration(min)	Freq(count)
		1	51	17	10
		8	4	1.33333
		11	4	1.33333
		12	6	2
		14	4	1.33333
		16	4	1.33333
		26	5	1.66667
		32	8	2.66667
		40	4	1.33333
		50	4	1.33333
004_visit4		label (pulse)	duration	duration(min)	Freq(count)
		1	91	30.3333	3
		14	5	1.66667
		15	6	2
004_visit6		label (pulse)	duration	duration(min)	Freq(count)
		3	7	2.33333	11
		13	80	26.6667
		14	9	3
		19	6	2
		26	17	5.66667
		27	5	1.66667
		32	5	1.66667
		35	4	1.33333
		47	4	1.33333
		52	12	4
		57	21	7

## Sheet: Trimmed_cytoplasm
15119_001_visit3		label (pulse)	duration	duration(min)	Freq(count)
		2	6	2	10
		3	91	30.3333
		4	50	16.6667
		5	14	4.66667
		7	4	1.33333
		18	8	2.66667
		37	39	13
		39	7	2.33333
		47	19	6.33333
		51	4	1.33333
15119_001_visit4		label (pulse)	duration	duration(min)	Freq(count)
		1	24	8	16
		3	9	3
		5	19	6.33333
		6	10	3.33333
		23	83	27.6667
		33	4	1.33333
		51	6	2
		52	13	4.33333
		54	5	1.66667
		61	23	7.66667
		78	6	2
		82	4	1.33333
		92	51	17
		114	4	1.33333
		136	7	2.33333
		140	4	1.33333
15119_001_visit8		label (pulse)	duration	duration(min)	Freq(count)
		1	5	1.66667	23
		3	91	30.3333
		4	4	1.33333
		5	91	30.3333
		22	78	26
		25	5	1.66667
		28	16	5.33333
		41	6	2
		43	17	5.66667
		56	5	1.66667
		65	11	3.66667
		74	5	1.66667
		77	9	3
		86	7	2.33333
		102	4	1.33333
		109	4	1.33333
		118	12	4
		125	4	1.33333
		138	6	2
		146	7	2.33333
		175	6	2
		182	10	3.33333
		194	4	1.33333
001_visit2		label (pulse)	duration	duration(min)	Freq(count)
		1	91	30.3333	4
		5	9	3
		10	8	2.66667
		13	6	2
001_visit4		label (pulse)	duration	duration(min)	Freq(count)
		1	91	30.3333	15
		5	8	2.66667
		6	5	1.66667
		14	5	1.66667
		22	6	2
		26	4	1.33333
		28	13	4.33333
		31	4	1.33333
		38	4	1.33333
		39	5	1.66667
		40	6	2
		42	5	1.66667
		46	4	1.33333
		51	14	4.66667
		54	5	1.66667
001_visit10		label (pulse)	duration	duration(min)	Freq(count)
		2	91	30.3333	28
		5	91	30.3333
		6	5	1.66667
		11	11	3.66667
		12	4	1.33333
		16	4	1.33333
		44	8	2.66667
		45	5	1.66667
		49	15	5
		66	7	2.33333
		97	12	4
		113	4	1.33333
		119	6	2
		122	8	2.66667
		138	6	2
		148	61	20.3333
		159	5	1.66667
		169	6	2
		187	4	1.33333
		199	5	1.66667
		207	4	1.33333
		212	7	2.33333
		215	4	1.33333
		227	4	1.33333
		247	4	1.33333
		265	4	1.33333
		274	4	1.33333
		278	4	1.33333
002_visit1		label (pulse)	duration	duration(min)	Freq(count)
		1	91	30.3333	23
		2	34	11.3333
		5	8	2.66667
		6	5	1.66667
		7	39	13
		15	6	2
		36	4	1.33333
		39	17	5.66667
		53	4	1.33333
		58	7	2.33333
		60	22	7.33333
		63	19	6.33333
		83	54	18
		88	5	1.66667
		101	8	2.66667
		119	13	4.33333
		122	18	6
		124	10	3.33333
		133	4	1.33333
		150	22	7.33333
		152	9	3
		154	5	1.66667
		190	7	2.33333
002_visit2		label (pulse)	duration	duration(min)	Freq(count)
		1	91	30.3333	10
		6	7	2.33333
		15	14	4.66667
		16	12	4
		20	4	1.33333
		24	7	2.33333
		51	11	3.66667
		54	6	2
		57	7	2.33333
		58	4	1.33333
003_visit1		label (pulse)	duration	duration(min)	Freq(count)
		1	27	9	30
		4	11	3.66667
		11	91	30.3333
		13	4	1.33333
		14	5	1.66667
		20	10	3.33333
		23	4	1.33333
		32	4	1.33333
		44	4	1.33333
		50	15	5
		52	5	1.66667
		58	4	1.33333
		60	9	3
		66	7	2.33333
		78	8	2.66667
		82	37	12.3333
		85	8	2.66667
		89	7	2.33333
		92	5	1.66667
		100	4	1.33333
		104	21	7
		109	4	1.33333
		111	5	1.66667
		112	5	1.66667
		113	6	2
		148	23	7.66667
		151	8	2.66667
		166	5	1.66667
		168	6	2
		181	4	1.33333
003_visit2		label (pulse)	duration	duration(min)	Freq(count)
		1	40	13.3333	11
		3	4	1.33333
		4	91	30.3333
		15	11	3.66667
		22	5	1.66667
		27	10	3.33333
		30	9	3
		37	5	1.66667
		41	4	1.33333
		48	32	10.6667
		54	7	2.33333
003_visit3		label (pulse)	duration	duration(min)	Freq(count)
		7	5	1.66667	18
		9	91	30.3333
		38	10	3.33333
		51	7	2.33333
		52	7	2.33333
		75	4	1.33333
		80	5	1.66667
		98	11	3.66667
		126	13	4.33333
		135	4	1.33333
		149	8	2.66667
		164	4	1.33333
		175	41	13.6667
		176	12	4
		196	4	1.33333
		218	10	3.33333
		224	5	1.66667
		246	6	2
003_visit4		label (pulse)	duration	duration(min)	Freq(count)
		1	91	30.3333	22
		3	12	4
		11	17	5.66667
		20	8	2.66667
		21	4	1.33333
		24	4	1.33333
		29	9	3
		43	5	1.66667
		48	13	4.33333
		50	7	2.33333
		87	14	4.66667
		95	4	1.33333
		96	71	23.6667
		103	7	2.33333
		116	5	1.66667
		142	4	1.33333
		149	5	1.66667
		158	8	2.66667
		170	5	1.66667
		186	11	3.66667
		192	10	3.33333
		206	7	2.33333
003_visit5		label (pulse)	duration	duration(min)	Freq(count)
		1	52	17.3333	6
		3	54	18
		4	91	30.3333
		5	91	30.3333
		9	5	1.66667
		16	42	14
003_visit6		label (pulse)	duration	duration(min)	Freq(count)
		2	74	24.6667	9
		10	4	1.33333
		30	4	1.33333
		42	5	1.66667
		43	6	2
		58	4	1.33333
		62	9	3
		63	16	5.33333
		66	12	4
004_visit1		label (pulse)	duration	duration(min)	Freq(count)
		1	38	12.6667	20
		2	9	3
		7	5	1.66667
		9	7	2.33333
		26	68	22.6667
		28	4	1.33333
		30	5	1.66667
		35	29	9.66667
		40	10	3.33333
		43	11	3.66667
		47	10	3.33333
		54	13	4.33333
		60	4	1.33333
		65	6	2
		66	28	9.33333
		67	6	2
		74	11	3.66667
		80	4	1.33333
		83	6	2
		85	5	1.66667
004_visit2		label (pulse)	duration	duration(min)	Freq(count)
		1	91	30.3333	8
		4	82	27.3333
		38	6	2
		39	5	1.66667
		49	4	1.33333
		76	5	1.66667
		78	4	1.33333
		81	6	2
004_visit3		label (pulse)	duration	duration(min)	Freq(count)
		1	73	24.3333	6
		2	4	1.33333
		7	14	4.66667
		22	4	1.33333
		35	16	5.33333
		41	40	13.3333
004_visit4		label (pulse)	duration	duration(min)	Freq(count)
		1	91	30.3333	13
		4	17	5.66667
		10	4	1.33333
		25	13	4.33333
		29	17	5.66667
		37	10	3.33333
		39	14	4.66667
		40	12	4
		46	9	3
		54	10	3.33333
		59	19	6.33333
		60	4	1.33333
		62	13	4.33333
004_visit6		label (pulse)	duration	duration(min)	Freq(count)
		1	44	14.6667	12
		2	91	30.3333
		19	4	1.33333
		23	7	2.33333
		25	32	10.6667
		26	4	1.33333
		30	4	1.33333
		33	4	1.33333
		39	24	8
		50	5	1.66667
		53	7	2.33333
		59	8	2.66667

## Sheet: pooled data
Non-(nucleus area)normalized Freq (count)		Freq(count)
		Cytoplasm	Nucleus
15119_001_visit3		10	8
15119_001_visit4		16	14
15119_001_visit8		23	12
001_visit2		4	3
001_visit4		15	6
001_visit10		28	9
002_visit1		23	13
002_visit2		10	8
003_visit1		30	18
003_visit2		11	3
003_visit3		18	9
003_visit4		22	5
003_visit5		6	12
003_visit6		9	9
004_visit1		20	13
004_visit2		8	6
004_visit3		6	10
004_visit4		13	3
004_visit6		12	11
Normalized Freq (count)											F-Test Two-Sample for Variances (null hypothesis is samples have same variance)
	Ratio	Cytoplasm	Nucleus	Cytoplasm_norm
15119_001_visit3	0.395312	10	8	3.95312								Cytoplasm	Nucleus
15119_001_visit4	0.684505	16	14	10.9521							Mean	5.70993	9.05263
15119_001_visit8	0.33538	23	12	7.71374							Variance	10.8703	16.9415
001_visit2	0.298153	4	3	1.19261							Observations	19	19
001_visit4	0.179293	15	6	2.68939							df	18	18
001_visit10	0.38265	28	9	10.7142							F	0.641637
002_visit1	0.382075	23	13	8.78771							P(F<=f) one-tail	0.177584
002_visit2	0.396714	10	8	3.96714							F Critical one-tail	0.45102		> samples have equal variance
003_visit1	0.442537	30	18	13.2761
003_visit2	0.368068	11	3	4.04875
003_visit3	0.225941	18	9	4.06694							t-Test: Two-Sample Assuming Equal Variances					t-Test: Paired Two Sample for Means
003_visit4	0.230716	22	5	5.07575
003_visit5	0.441818	6	12	2.65091								Variable 1	Variable 2				Variable 1	Variable 2
003_visit6	0.363989	9	9	3.2759							Mean	5.70993	9.05263			Mean	9.05263	5.70993
004_visit1	0.407683	20	13	8.15366							Variance	10.8703	16.9415			Variance	16.9415	10.8703
004_visit2	0.378092	8	6	3.02474							Observations	19	19			Observations	19	19
004_visit3	0.730169	6	10	4.38101							Pooled Variance	13.9059				Pearson Correlation	0.699019
004_visit4	0.435989	13	3	5.66786							Hypothesized Mean Difference	0				Hypothesized Mean Difference	0
004_visit6	0.408089	12	11	4.89707							df	36				df	18
	STDEV.P	7.44435	4.00623	3.20908							t Stat	-2.76286				t Stat	4.90067
	Variance	55.4183	16.0499	10.2982							P(T<=t) one-tail	0.00448444				P(T<=t) one-tail	5.75811e-05
											t Critical one-tail	1.6883				t Critical one-tail	1.73406
											P(T<=t) two-tail	0.00896887				P(T<=t) two-tail	0.000115162
									t Critical two-tail	2.02809						t Critical two-tail	2.10092
Quantile-quantile plot tset for normality
Data	Rank	Percentile	Z-score	Data		Data	Rank	Percentile	Z-score	Data
1.19261	1	0.0263158	-1.93793	1.19261		3	1	0.0263158	-1.93793	3
2.65091	2	0.0789474	-1.41219	2.65091		3	1	0.0263158	-1.93793	3
2.68939	3	0.131579	-1.11896	2.68939		3	1	0.0263158	-1.93793	3
3.02474	4	0.184211	-0.899435	3.02474		5	4	0.184211	-0.899435	5
3.2759	5	0.236842	-0.716498	3.2759		6	5	0.236842	-0.716498	6
3.95312	6	0.289474	-0.554923	3.95312		6	5	0.236842	-0.716498	6
3.96714	7	0.342105	-0.406724	3.96714		8	7	0.342105	-0.406724	8
4.04875	8	0.394737	-0.266994	4.04875		8	7	0.342105	-0.406724	8
4.06694	9	0.447368	-0.132313	4.06694		9	9	0.447368	-0.132313	9
4.38101	10	0.5	0	4.38101		9	9	0.447368	-0.132313	9
4.89707	11	0.552632	0.132313	4.89707		9	9	0.447368	-0.132313	9
5.07575	12	0.605263	0.266994	5.07575		10	12	0.605263	0.266994	10
5.66786	13	0.657895	0.406724	5.66786		11	13	0.657895	0.406724	11
7.71374	14	0.710526	0.554923	7.71374		12	14	0.710526	0.554923	12
8.15366	15	0.763158	0.716498	8.15366		12	14	0.710526	0.554923	12
8.78771	16	0.815789	0.899435	8.78771		13	16	0.815789	0.899435	13
10.7142	17	0.868421	1.11896	10.7142		13	16	0.815789	0.899435	13
10.9521	18	0.921053	1.41219	10.9521		14	18	0.921053	1.41219	14
13.2761	19	0.973684	1.93793	13.2761		18	19	0.973684	1.93793	18
