# Supplementary material for: Generation of stress fibers through myosin-driven reorganization of the actin cortex
Source: eLife. 2021 Jan 28;10:e60710. doi: 10.7554/eLife.60710 (PMC7877910; doi:10.7554/eLife.60710)
Supplement: Figure 4—figure supplement 1—source data 1. [file elife-60710-fig4-figsupp1-data1.xlsx]

## Sheet: Mappings2020_10_05_T_18_14_59_1
		Number of SF, classes
Decoded	Coded filenames (blind quantified)	0 fibers	1-3 fibers	4-6 fibers	7-10 fibers	>10 fibers/cell		Cell number
170920_U2OS_fibro_SMIFH2_DAPI_phall488_vinc647_011	File_5c6ac70c_0f3f_4b4d_9de1_394b7504440c	11	2,3,3	1					U2OS
170920_U2OS_fibro_SMIFH2_DAPI_phall488_vinc647_008	File_ef620cc3_23c1_4d1b_ae40_596e15c647c5	17	0.2	1					Ctrl	mDia1_siRNA	mDia2_siRNA	SMIFH2	WT
170920_U2OS_fibro_SMIFH2_DAPI_phall488_vinc647_004	File_03336a8b_9591_4f61_b48b_865fe1d23f40	22	3					0 fibers/cell	92	74	59	171	109
170920_U2OS_fibro_SMIFH2_DAPI_phall488_vinc647_005	File_b435461d_1267_4414_88a2_7eb18470a53f	14	2,1,1	1				1-3 fibers/cell	73	39	39	48	57
170920_U2OS_fibro_SMIFH2_DAPI_phall488_vinc647_010	File_b17bfdf1_a460_4555_ab94_e80655302e83	25	1.1	1				4-6 fibers/cell	35	31	22	8	29
170920_U2OS_fibro_SMIFH2_DAPI_phall488_vinc647_007	File_0b4d6ec2_a8a8_4631_a98d_022a111a9b20	20	5					7-10 fibers/cell	23	13	12	0	10
170920_U2OS_fibro_SMIFH2_DAPI_phall488_vinc647_006	File_61f1f89f_a386_4389_bb58_041d04b5c969	25	2.1	1				<10 fibers/cell	9	6	6	2	4
170920_U2OS_fibro_SMIFH2_DAPI_phall488_vinc647_009	File_04e243f6_bb66_4e00_81cb_005127a172d6	14	5,2,0	1				total	232	163	138	229	209
170920_U2OS_fibro_SMIFH2_DAPI_phall488_vinc647_003	File_42b83569_e669_46c9_9771_0cb7adcdd951	8	4,0,2	1,0,1		1.1
170920_U2OS_fibro_SMIFH2_DAPI_phall488_vinc647_002	File_636ab7cd_72a1_4a58_835b_415588c8eec5	15	4,2,2
								% distribution
170920_U2OS_fibro_ctrlsiRNA_DAPI_phall488_vinc647_012	File_aad86c81_0a06_4144_86fb_362c9fa62f29	5	4,2,1	1.1	2,1,1				U2OS
170920_U2OS_fibro_ctrlsiRNA_DAPI_phall488_vinc647_004	File_789d7feb_8341_497f_b254_97e09642eb60	4	4,2,3	1,3,2	1,3,1	2.1			Ctrl_siRNA	mDia1_siRNA	mDia2_siRNA	SMIFH2	WT
170920_U2OS_fibro_ctrlsiRNA_DAPI_phall488_vinc647_003	File_2c7c47f6_5847_4acc_b57b_afc729634c9b	9	2,2,1	2.1				0 fibers/cell	39.6552	45.3988	42.7536	74.6725	52.1531
170920_U2OS_fibro_ctrlsiRNA_DAPI_phall488_vinc647_010	File_d50e1202_eaa9_4dae_b3b2_77be2b2c08c4	7	0,3,3	2	2			1-3 fibers/cell	31.4655	23.9264	28.2609	20.9607	27.2727
170920_U2OS_fibro_ctrlsiRNA_DAPI_phall488_vinc647_009	File_78cfdb1b_ee63_4940_b53c_d0936618f627	11	1,1,2	2.1	1.1			4-6 fibers/cell	15.0862	19.0184	15.942	3.49345	13.8756
170920_U2OS_fibro_ctrlsiRNA_DAPI_phall488_vinc647_008	File_eff34b03_03b8_42c1_8ef1_b78651fd85fa	5	1,3,2	1.1	2	1		7-10 fibers/cell	9.91379	7.97546	8.69565	0	4.78469
170920_U2OS_fibro_ctrlsiRNA_DAPI_phall488_vinc647_011	File_f7faa1d0_a55f_4368_852b_0b84c1680b81	8	0,4,2	1.2	1	1,1,1,1		<10 fibers/cell	3.87931	3.68098	4.34783	0.873362	1.91388
170920_U2OS_fibro_ctrlsiRNA_DAPI_phall488_vinc647_014	File_3aa97567_4687_418c_8c2a_06ab6f4d615d	4	3,2,2	2.1	1			total	100	100	100	100	100
170920_U2OS_fibro_ctrlsiRNA_DAPI_phall488_vinc647_013	File_3690a83a_6981_48ce_8011_06d93d862275	9	2,4,1	3.1	1
170920_U2OS_fibro_ctrlsiRNA_DAPI_phall488_vinc647_006	File_6676849a_6f09_4eab_93d9_1b44d3112eb2	6	0,4,1	1.1	1,1,1
170920_U2OS_fibro_ctrlsiRNA_DAPI_phall488_vinc647_002	File_1752ab21_0ff7_4736_bcd4_f860ef6f1ac0	9	2,1,1	1.1	1	1
170920_U2OS_fibro_ctrlsiRNA_DAPI_phall488_vinc647_007	File_ce8ac16a_3ba3_48fb_a1c2_2af496b4998f	15	2,1,4	2.1	1
170920_U2OS_fibro_DIAPH1_DAPI_phall488_vinc647_004	File_cd45fbe8_afe5_4ae2_acdd_7167c43d1182	4	1,2,3	1,1,1
170920_U2OS_fibro_DIAPH1_DAPI_phall488_vinc647_006	File_01b38a3f_72a3_4758_84dd_71e830becc45	11	1,1,2	3		1
170920_U2OS_fibro_DIAPH1_DAPI_phall488_vinc647_011	File_9d26a36e_cd76_455d_8288_bf6f51301b7c	7	2,2,2	0.2	1
170920_U2OS_fibro_DIAPH1_DAPI_phall488_vinc647_003	File_dd1ac3bf_c21b_42c3_9571_4eb0e4662860	15	0,0,1	2,1,1	1.1
170920_U2OS_fibro_DIAPH1_DAPI_phall488_vinc647_001	File_9d0fbe08_0976_456b_a1b6_c6e25c6efed9	7	1,1,3	3,2,2	1
170920_U2OS_fibro_DIAPH1_DAPI_phall488_vinc647_012	File_a53924b7_6976_44af_9ae6_cf36602d709a	4	2,1,1	1,0,2	1	1
170920_U2OS_fibro_DIAPH1_DAPI_phall488_vinc647_008	File_57c731a0_59c7_4e10_b79e_cd1ab52f1d7e	3	2,3,2	3.2	1.3	1,1,1
170920_U2OS_fibro_DIAPH1_DAPI_phall488_vinc647_010	File_ba6a4194_8559_4eee_b789_8b0011af4c08	0	1.2	2	1.1	1
170920_U2OS_fibro_DIAPH1_DAPI_phall488_vinc647_005	File_5006bb76_8c27_4a8a_bfb5_088b9a6ebd95	3	0,2,1	1.1	1.1
170920_U2OS_fibro_DIAPH1_DAPI_phall488_vinc647_013	File_a83b6902_22ad_4ecc_b246_777650e4bbd7	not good quality
170920_U2OS_fibro_DIAPH1_DAPI_phall488_vinc647_002	File_334896ad_2ba2_43df_9f31_1c1355d7f44e	8	3,1,3	1,1,1	2
170920_U2OS_fibro_DIAPH1_DAPI_phall488_vinc647_009	File_6957c9c1_ac59_4f00_98c6_6973fab7c322	3	2,1,1	1,1,1	2
170920_U2OS_fibro_DIAPH1_DAPI_phall488_vinc647_007	File_12da0081_12f7_4b6a_80eb_27aa5cae7cd0	9	2,2,2	1	1
170920_U2OS_fibro_DIAPH2_DAPI_phall488_vinc647_004	File_8e4cf1bb_abae_4d0d_9ab4_129df7178f86	2	1,2,2	1
170920_U2OS_fibro_DIAPH2_DAPI_phall488_vinc647_006	File_8554bb38_f6dc_447e_8332_34494a4bbe79	4	3,1,2	1.1	1	1.1
170920_U2OS_fibro_DIAPH2_DAPI_phall488_vinc647_007	File_2ed6b8e4_c330_4e44_942b_63376bae934e	6	0,3,2	2
170920_U2OS_fibro_DIAPH2_DAPI_phall488_vinc647_003	File_60e18a89_9106_40c0_b113_8bc6c91a0018	10	0.1	3,1,1		1
170920_U2OS_fibro_DIAPH2_DAPI_phall488_vinc647_005	File_153e230c_68ad_4146_b250_c707fcb4ee3a	10	1,1,1	2	2.1	1
170920_U2OS_fibro_DIAPH2_DAPI_phall488_vinc647_010	File_05dca405_0f0a_4881_bf61_3578ab4eabc4	6	1,1,1	1.1	1.1	1
170920_U2OS_fibro_DIAPH2_DAPI_phall488_vinc647_011	File_db7c12cb_d803_453c_976e_9d7be4e24133	4	1.1	1	1,1,1
170920_U2OS_fibro_DIAPH2_DAPI_phall488_vinc647_009	File_06906d3e_5b60_4d67_8230_0ba8d1af9454	4	0,0,2	1	1	1
170920_U2OS_fibro_DIAPH2_DAPI_phall488_vinc647_012	File_c7550ac3_6c0c_4ce0_8ebe_232b9ebc362c	5	4,1,2		1
170920_U2OS_fibro_DIAPH2_DAPI_phall488_vinc647_008	File_6f9f1bef_edfd_4cb2_af34_c4cb3c324b4a	8	1,2,2	1.5	1
170920_U2OS_fibro_WT_DAPI_phall488_vinc647_013	File_4aa471c8_2af4_4dbc_9e8d_5ef9ab29a3d9	10	2,1,5	1.2	1	1
170920_U2OS_fibro_WT_DAPI_phall488_vinc647_011	File_a7d968b5_1343_42e7_9a78_87de66828804	14	2.2	1.2
170920_U2OS_fibro_WT_DAPI_phall488_vinc647_003	File_d3838bfe_0669_4eba_a0d9_70eb77e9b974	14	2,1,3	1.3	1
170920_U2OS_fibro_WT_DAPI_phall488_vinc647_007	File_7243b03d_a2f1_4666_bbf0_91d7870052f5	6	1,0,1	2	1	1
170920_U2OS_fibro_WT_DAPI_phall488_vinc647_004	File_fb784ca9_3f13_432e_af35_2d840bcfb07e	15	2,0,1	1,1,2
170920_U2OS_fibro_WT_DAPI_phall488_vinc647_009	File_5ea34574_f247_4436_bef4_09f157734b1a	7	0,4,3	3.1	1.1
170920_U2OS_fibro_WT_DAPI_phall488_vinc647_005	File_5038bc2a_00b3_4f7c_a49c_1be97dc2c5f9	8	0,2,2	1.1
170920_U2OS_fibro_WT_DAPI_phall488_vinc647_008	File_329d52fa_574c_4828_838c_4b0973fd090f	14	1,2,2	1,1,1	1.2
170920_U2OS_fibro_WT_DAPI_phall488_vinc647_012	File_8852f06a_e705_4df9_a76e_1f68de802362	15	6,1,4	1.1		1
170920_U2OS_fibro_WT_DAPI_phall488_vinc647_006	File_32aa5b49_fd6c_45f9_b6a7_aa427b7a50ee	6	3,1,3	0.2	1.1	1
170920_U2OS_fibro_WT_DAPI_phall488_vinc647_010	File_120f1c99_012c_4826_8617_0721c176cdf8	too confluent
