# Supplementary material for: Generation of stress fibers through myosin-driven reorganization of the actin cortex
Source: eLife. 2021 Jan 28;10:e60710. doi: 10.7554/eLife.60710 (PMC7877910; doi:10.7554/eLife.60710)
Supplement: Figure 4—source data 1. [file elife-60710-fig4-data1.xlsx]

## Sheet: Sheet1
	Number of basal stress fibers									Raw data from blind quantification of SF number
	DMSO		CK666		Blebbistatin					o A = CK666_U2OS
Number of basal stress fibers/cell	U2OS	MEF	U2OS	MEF	U2OS	MEF				o B = p-amino Blebbistatin
0 fibers	95	18	117	31	181	172				o D = DMSO
1-3 fibers	40	78	38	52	14	24				o F = CK666_MEF
4-6 fibers	14	62	6	39	0	2				o G = p-amino Blebbistatin MEF
7-10 fibers	8	62	5	27	0	0				o I = DMSO MEF
10+ fibers	0	27	0	33	0	0				A
total	157	247	166	182	195	198				1	9 x 0; 4 x 1; 2 x2
%-distribution										2	12 x 0; 2
	DMSO		CK666		Blebbistatin					3	9 x 0; 3 x 1; 2; 2 x 3; 5; 6
	U2OS	MEF	U2OS	MEF	U2OS	MEF				4	9 x 0; 1; 3;
0 fibers/cell	60.5096	7.28745	70.4819	17.033	92.8205	86.8687				5	9 x 0; 2 x 1; 2 x 2; 2 x 3
1-3 fibers/cell	25.4777	31.5789	22.8916	28.5714	7.17949	12.1212				6	10 x 0; 1; 4; 5
4-6 fibers/cell	8.9172	25.1012	3.61446	21.4286	0	1.0101				7	13 x 0; 1; 2
7-10 fibers/cell	5.09554	25.1012	3.01205	14.8352	0	0				8	8 x 0; 3 x 1; 7
<10 fibers/cell	0	10.9312	0	18.1319	0	0				9	18 x 0; 1 ; 4 x 2; 4
total	100	100	100	100	100	100				10	15 x 0; 2 x 1; 2; 7; 2 x 8; 9
										11	5 x 0; 2 x 1; 2; 4
										F
										1	3 x 0; 3 x 1; 3; 3 x 4; 2 x 5; 4 x 6; 7; 9; 10; 2 x 12
										2	0; 3; 4; 3 x 5; 2 x 6; 7; 8, 10; 12; 13; 16
										3	6 x 0; 2 x 1; 3 x 2; 2 x 3; 5; 2 x 6; 7; 8; 3 x 10; 11
										4	0; 2 x 1; 3 x 2; 2 x 6; 8; 2 x 9; 2 x 10; 13
										5	3 x 0; 4 x 1; 2 x 4; 6; 7; 9; 12; 18
										6	2 x 0; 2 x 1; 2 x 2; 4; 8; 10; 2 x 11; 2 x 12; 14
										7	2 x 0; 2; 4 x 3; 2 x 4; 2 x 5; 3 x 6; 3 x 9; 10; 12; 14
										8	3 x 0; 1; 2; 3; 4; 2 x 5; 6; 7; 3 x 8; 14
										9	0; 1; 2; 4; 2 x 5; 8; 12; 13; 15
										10	1; 2 x 4; 5; 3 x 6; 2 x 7; 8; 9; 10; 11; 13
										11	3x3; 3 x 6; 9; 2 x 11; 12; 14; 15; 18
										12	0; 3; 2 x 6; 7; 2 x 8; 11; 14; 15
										13	3 x 0: 2 x 1; 2 x 2; 3; 4; 2 x 11; 16; 17; 18; 22
										14	2 x 0; 2 x 1; 2; 3 x4; 2 x 5; 7; 8; 13
										15	3 x 0; 2; 2 x 3; 2 x 4; 2 x 6; 9; 2 x 10; 11; 12
										G
										1	15 x 0
										2	16 x 0; 2 x 1
										3	17 x 0; 2 x 1; 1 x 5
										4	14 x 0; 2 x 3
										5	4 x 0; 2 x 2
										6	18 x 0; 1; 2
										7	16 x 0; 2 x 2; 3
										8	11 x 0; 2
										9	16 x 0; 2 x 1
										10	12 x 0; 1; 3
										11	17 x 0; 2 x 1; 2
										12	16 x 0; 1; 2 x 2; 4
										I
										1	0; 2 x 1; 2 x 2; 2 x 3; 4; 5; 5 x 6; 2 x7; 10; 12; 13
										2	0; 3 x 1; 2; 3 x 3; 4 x 4; 3 x 5; 6; 8; 3 x 9; 2 x 11; 13
										3	0; 2 x 1; 3 x 2; 3; 4 x 4; 5; 4 x 6; 2 x 7; 3 x 8; 9
										4	2; 4; 2 x 5; 6; 4 x 7; 8; 4 x 9; 3 x 10; 11; 15
										5	0; 1; 2 x 2; 4 x 3; 4; 2 x 5; 6; 2 x 8; 2 x 9; 10; 11; 13; 17
										6	4 x 0; 2 x 1; 2 x 2; 2 x 3; 2 x 4; 5; 6; 7; 2 x 8; 2 x 9; 2 x 12; 13
										7	3 x 0; 2 x 1; 3 x 2; 3; 2 x 4; 3 x 5; 2 x 6; 9; 2 x 10; 11; 15
										8	0; 1; 2; 2 x 3; 2 x 4; 2 x 5; 6; 2 x 8; 10; 11; 17; 19
										9	0; 2 x 2; 3; 4; 6; 2 x 7; 2 x 8; 3 x 9; 11; 13; 16; 22
										10	4 x 0; 2 x 1; 2; 3 x 3; 4 x 4; 2 x 5; 2 x 7; 2 x 8; 2 x 10; 2 x 12; 15
										11	0; 2 x 1; 2 x 2; 2 x 3; 3 x 4; 5; 2 x 6; 3 x 7; 8; 3 x 9; 10; 2 x 12
										B
										1	20 x 0
										2	20 x 0; 2 x 1
										3	25 x 0; 2 x 1 ; 2
										4	37 x 0; 1
										5	25 x 0; 1
										6	22 x 0; 3 x 1; 2
										7	too crowded
										8	too crowded
										9	18 x 0; 3 x 1
										10	14 x 0
										D
										1	10 x 0; 2 x 1; 2 x 3; 4; 5; 6
										2	14 x 0; 3 x 1; 3 x 2; 3; 2 x 4; 8
										3	9 x 0; 1; 2 x 2; 3; 5; 8; 10
										4	too crowded
										5	16 x 0; 3 x 1; 2 x 2; 2 x 3
										6	15 x 0; 2 x 1; 2 x 2; 4; 5; 6
										7	7 x 0; 3; 7; 8
										8	10 x 0; 2 x 2; 3; 5
										9	10 x 0; 2 x 1; 2: 3: 2 x 4; 5; 7
										10	4 x 0; 3 x 1; 2 x 2; 3; 6; 2 x 9
										10	4 x 0; 3 x 1; 2 x 2; 3; 6; 2 x 9
